# Supplementary material for: A systematic analysis of nucleosome core particle and nucleosome-nucleosome stacking structure
Source: PubMed Central journal article supplement (PMC5784010; doi:10.1038/s41598-018-19875-0), 2018-01-24
Supplement: 41598_2018_19875_MOESM1_ESM.pdf [file 41598_2018_19875_MOESM1_ESM.pdf]

**Supporting Material for the manuscript:**

**“A systematic analysis of nucleosome core particle and  
nucleosome-nucleosome stacking structure”**

by Nikolay Korolev, Alexander P. Lyubartsev, and Lars Nordenskiöld

## I. Supporting computations methods

### 1.1. Calculation of the orientation and parameters of an ideal superhelix

The procedure to determine an ideal superhelix representing dsDNA wrapped around the histone core is performed as follows: First, for each of the NCP crystal structures reported in the PDB database, a 129 bp central fragment of DNA wrapped around octamer core was selected and the coordinates of the axis points of the double helical DNA were determined at the level of each basepair using the Curves+ software (1,2). (See ref (1) for definition and description of the calculation algorithm of the DNA axis).

Let us denote axis the coordinates as  $\{\vec{r}_i\}$ ,  $i = 1, \dots, 129$ . We define the DNA superhelix axis as the axis most "perpendicular" to all the fragments of the dsDNA axes, by minimization of the sum of scalar products of vectors representing the DNA axis,  $\vec{r}_{i+1} - \vec{r}_i$ , with a unit vector  $\vec{A}$  directed along the superhelix axis:

$$S = \sum_{i=1}^{128} \left( (\vec{r}_{i+1} - \vec{r}_i) \cdot \vec{A} \right)^2 \quad (\text{S1})$$

Minimization of  $S$  varying the coordinates of the vector  $\vec{A}$  under constraint condition  $\vec{A}^2 = 1$  leads to equation:

$$\frac{d}{d\vec{A}} (S - \lambda \vec{A}^2) = 0 \quad (\text{S2})$$

where  $\lambda$  is a Lagrange multiplier. Further mathematical operations result in an eigenvalue problem:

$$M\vec{A} = \lambda\vec{A} \quad (\text{S3})$$

with the matrix  $M$  determined by the tensor products of vectors:

$$M = \sum_{i=1}^{128} (\vec{r}_{i+1} - \vec{r}_i) \otimes (\vec{r}_{i+1} - \vec{r}_i) \quad (\text{S4})$$

Solution of the eigenvalue problem (eq. S3) results in 3 eigenvalues and 3 eigenvectors. The direction of the superhelix axis is determined by the eigenvector corresponding to the minimum eigenvalue. Furthermore, the eigenvector corresponding to the maximum eigenvalue determines direction of the dyad axis while the third eigenvector is orthogonal to the two first. The three eigenvectors thus determines the local coordinate system of the NCP in which the superhelix axis determines the  $Z$  direction and dyad axis determines  $X$  direction.

After determination of the superhelix axis and the NCP local coordinate system, the parameters of the superhelix can be determined straightforwardly. The coordinates of the dsDNA axis  $\{\vec{r}_i\}$  are recalculated in a local cylindrical coordinate system as  $(r'_i, \phi_i, h_i)$ . The average of the radial coordinates  $r'_i$  determines the superhelix radius; the average phase shift

( $\phi_{i+1} - \phi_i$ ) determines the average number of base pairs per superhelix turn, and the average difference of the height coordinates ( $h_{i+1} - h_i$ ) multiplied by the number of base pairs per superhelix turn defines the superhelix rise.

## 1.2. Coarse Grained Molecular Dynamics simulations of NCP condensation

To get a deeper insight into the structure of the NCP-NCP stacking we analysed the results of our earlier coarse-grained (CG) MD simulations in a system of 20 CG-modelled NCPs in the presence of explicit mono- ( $K^+$ ), di- ( $Mg^{2+}$ ) and tri- ( $CoHex^{3+} = [Co(NH_3)_6]^{3+}$ ) cations (3,4). The detailed description of the CG NCP model, construction of the simulation system and explanation of the MD simulation setup and analysis of the results are given in the cited works (3,4). Below brief overview of the NCP model and applied MD method is given.

**1.2.1. Coarse-grained model of the NCP.** A CG NCP model reproduces shape of the real NCP combining histone octamer core and double helical DNA wrapped around it. It also includes flexible histone tails with resolution of 1 particle per amino acid (see Fig. 7A of the main text).

The 148 bp of the nucleosomal DNA are described as sequence of 74 five-bead units where each unit includes four beads each representing DNA charged phosphate group and one bead resembling four nucleosides from the two DNA base pairs. The internal DNA structure was maintained by bond and angular interactions fixed between neighbouring CG sites by harmonic potentials. Each phosphate group was assigned a charge  $-1e$ . The overall DNA structure is similar to space-filling grooved B-form DNA model with explicit charged on the phosphate groups used previously to study the ionic ion-DNA interaction and selectivity (5-10).

In the core part of the histone octamer (HO) each amino acid was represented as a bead with a charge assigned according to the amino acid type: lysine and arginine,  $+1e$ ; aspartate and glutamate,  $-1e$ ; the other amino acids were neutral. The initial coordinates of the beads (of total number 710; with 116 positive, 64 negative, and 530 neutral particles; net charge  $+52e$ ) were set to the centers of mass of the amino acids determined from the NCP high resolution crystal structure, 1KX5 (11). In order to keep the structure of the core region intact during simulations, the particles of the histone core were bound applying an elastic network scheme (12). The DNA was linked to the HO core by harmonic bonds connecting each DNA central bead with the nearest amino acid bead of the histone core according to the 1KX5 crystal structure. The histone tails were modeled as 10 strings of linearly-connected beads with the length and charge assignment mimicking the *Xenopus laevis* histones used in the

1KX5 crystal (11). The number of particles in each tail was 20, 35, 43, 24 and 13 for the H2A, H2B, H3 H4 and H2A-C (H2A-C is the short unstructured tail at the C-terminal of the H2A histone). The charges were assigned according to the amino acid sequence, resulting in total charge +94e from the 10 histone tails. The particle of each tail closest to the histone core was connected to the HO core according to the histone amino acid sequence.

The total number of CG beads comprising each NCP was 1350. The short range interactions were described by a repulsive  $r^{-12}$  potential with effective radii specific for each CG site so that contact distances between particles matched the ones observed in the NCP crystal structures and in the NCP (13,14) and in the histone tail – DNA MD simulations (15-17). The charges of the DNA, histone core and histone tails as well as of ions were treated explicitly by a Coulombic potential scaled by the dielectric permittivity of water  $\epsilon = 78$ . The net charge of each NCP was  $-150e$ , with contributions  $-296e$ ,  $+52e$  and  $+94e$  from DNA, histone core and histone tails, respectively.

**1.2.2. Langevin Molecular Dynamics.** The Langevin MD method as implemented in the ESPResSo package (18) was used for the simulations (see (3,4) for details). The friction and random forces mimic the effect of solvent, which makes the method very suitable to simulate continuum solvent models (19,20). Since we are interested only in equilibrium properties, the masses of the particles and the parameters of the Langevin thermostat were set to get fast sampling of the configuration space and an efficient computation of the canonical averages. The electrostatic interactions were treated by the P3M method (21).

In the present work, a cubic periodic box of size 500 Å contained 20 CG NCPs and 1000 neutralizing three-valent counterions representing CoHex<sup>3+</sup>. The effective CoHex<sup>3+</sup> radius was set to 3.5 Å (which was the same as in the earlier simulations with 10 NCPs (3) and was validated in our previous work (8)). The time step was set to 0.04 in the reduced units used in ESPResSo package (which correspond to about 30 fs in real units). Simulations were started from a random configuration, were run for  $2 \times 10^7$  time units (equivalent to 15  $\mu$ s of real time) of which the first  $10^7$  steps were disregarded in analysis. The obtained trajectories were used for computations of RDFs. Convergence of the simulations was checked by calculations of NCP-NCP center of mass RDFs in  $2.5 \cdot 10^6$  MD steps windows and ensuring that no trends in RDFs are observed.

One of the major advantages of the models developed in (3) is that the systems of one or multiply NCPs provide an accurate description of the electrostatic interactions, which includes mobile ions, charges of DNA phosphate groups as well as charges of the histone

tails and in the core region. The beads belonging to the DNA and the histone octamer are held together in a single NCP by a network of harmonic bond and angle interactions.

**1.2.3. Spatial Distribution Function (SDF).** The density distribution of mobile species (ions or particles of the histone tails) as well as other NCPs around a given NCP can be visualized by calculation of spatial distribution functions (SDF) using an approach developed earlier in MD simulations of DNA (22-24). The local coordinate frame for the SDF was defined by the positions of three particles chosen in the distant parts of the gHO. The SDF density of every set of particles (e.g. belonging to one of the tails) was calculated in this frame which was also used for calculation of the average NCP structure. SDFs were visualized as iso-surfaces drawn at the given level of intensity around the central NCP.

## II. Supporting Figures

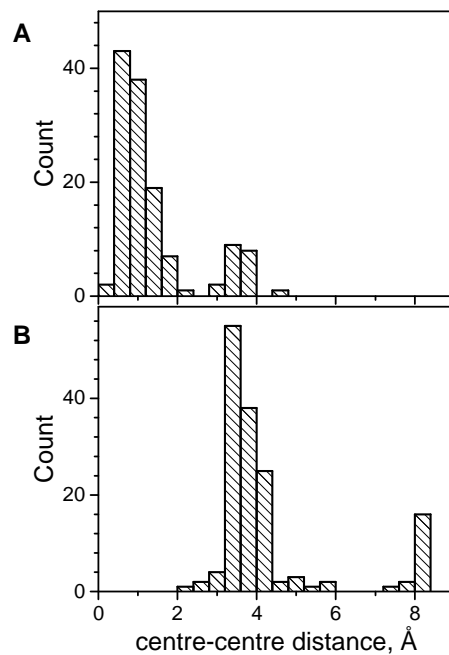

**Figure S1.** Statistics of distances between centres of the two coordinate systems: one based on the NCP symmetry proposed in this work; the other using the trace of the DNA helical axis wrapped as superhelix (SH) around the histone octamer. **(A)** The origin of the SH-based system is defined using all 145-147 DNA helical axis points. **(B)** The origin of the SH-based system is defined as the centre of an ideal SH found by fitting the coordinates of the 129 central DNA axis points (centre-centre distances shown in (B) are listed in the last column of Table S2 of the SM).

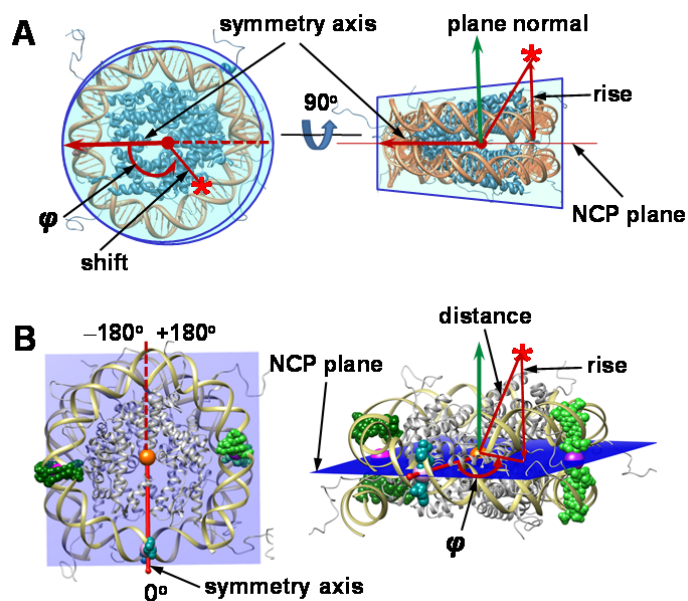

**Figure S2.** The set of parameters defining how the position of an arbitrary point (red star) is described in the NCP-centred coordinate system. **(A).** NCP approximated as wedge cylinder shown from the top (left) and from the side (right). The position of a point in the NCP coordinates is defined by (i) distance to the NCP centre (COM of the gHO); (ii) shift, the distance from the gHO COM to a projection of the point on the NCP plane; (iii) shift angle  $\varphi$ , the angle between the NCP symmetry axis and the shift line (**Fig. S2A**, left); (iv) rise is a distance from a point to the NCP plane. The value of the rise may be positive or negative depending on the point being located above or below the NCP plane. **(B).** Additional explanation on the NCP coordinate system. The left cartoon shows the range of the angle  $\varphi$  changing from  $0^\circ$  to respectively  $+180^\circ$  or  $-180^\circ$  to the right or to the left from the symmetry axis. The right cartoon shows that the distance from the point to the NCP centre may also be used.

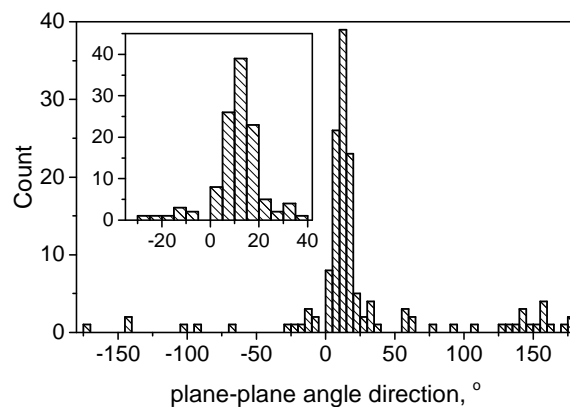

**Figure S3.** Statistics of direction of the angle between planes of the two NCPs (tilt direction). The tilt direction is defined as an angle between symmetry axis of the NCP1 and projection of the vector that is normal to the NCP2 plane as explained in Fig. 6D of the main text. Insert shows the data for the most populated range in the published crystal structures. Numerical data are given in Table S3 of the Supporting Material.

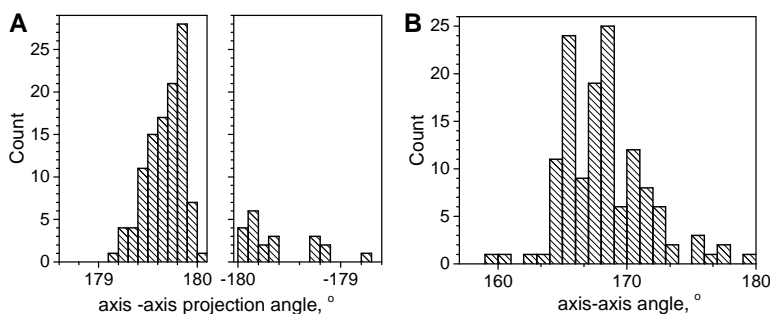

**Figure S4.** Statistics of mutual orientation of the symmetry axes for the stacking contact between NCPs in the published crystal structures. **(A)** Axis-axis orientation or angle between symmetry axis of the NCP1 and projection of the symmetry axis of the NCP2 on the NCP1 plane (see scheme in Fig. 5B of the main text). **(B)** Axis-axis angle. In **(A)** and **(B)** only range of angles characteristic for the head-to-tail NCP orientation is included; few cases of the alternative head-to-head axis orientations are not shown. Numerical data are given in Table S3 of the Supporting Material.



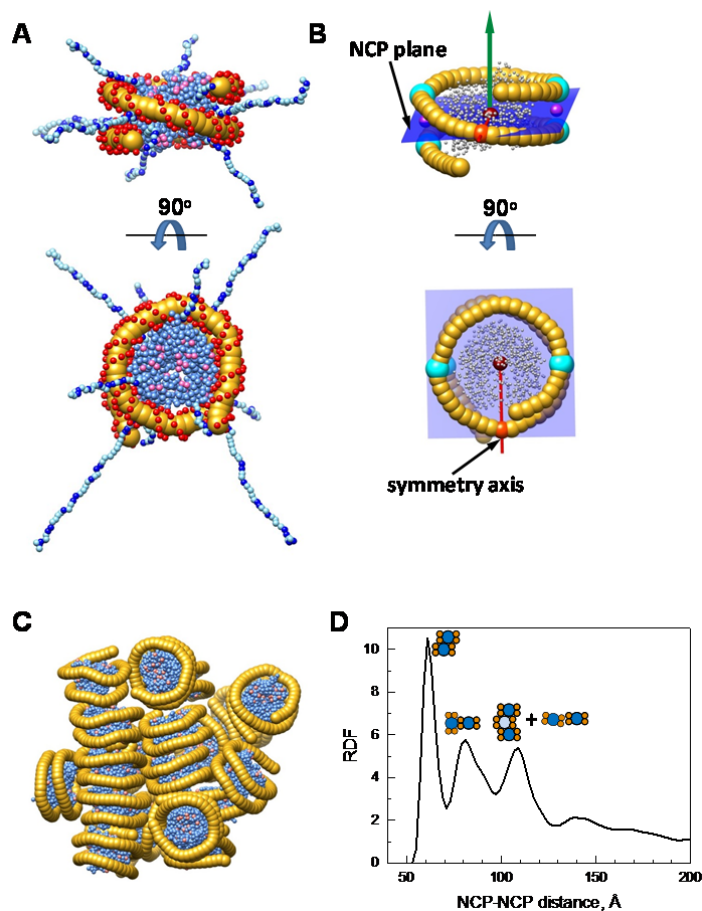

**Figure S5.** Coarse graining modelling of NCP-NCP interactions. **(A)** CG model of the NCP with explicit charges on the DNA and histones. Front and top views of the model are shown in the top and bottom panel, positively charged amino acids of the tails are in blue; negatively charged particles of the core histone domain are in pink. **(B)** Schematic representation of the symmetry coordinates developed for the CG NCP. The COM (red sphere) was defined using the coordinates of the amino acid beads of the core HO; the symmetry axis (red rod) was drawn through the COM and the DNA central particle. The NCP plane (shown in blue) was defined as the median plane of the two planes which had a common line, the symmetry axis, while the third points of these two planes was placed in the middle of the line connecting two DNA beads of the two opposite DNA strands at the opposite sides of the NCP dyad axis (the vector normal to the plane is a green arrow). DNA beads used to define symmetry axis and plane are highlighted in red and cyan. **(C)** A snapshot of the simulation in the system of 20 CG NCPs with CoHex<sup>3+</sup> cations. Histone tails and CoHex<sup>3+</sup> cations are not shown for clarity. **(D)** NCP-NCP distance correlation calculated for the system of 20 CG NCPs with CoHex<sup>3+</sup> cations (adapted from (4) with permission). Cartoons near the peaks sketch the respective structures of the NCP-NCP contact.

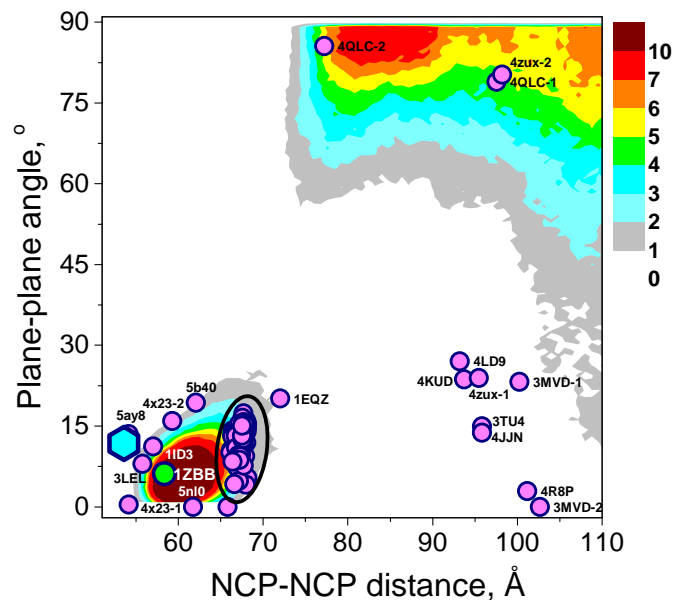

**Figure S6.** Correlation between the NCP-NCP distance and angle between the NCP planes. Contour areas in colour are the result of the MD simulations for 20 NCPs with CoHex<sup>3+</sup> cations; points display the data calculated for the NCP crystals and reported in Table S3 of the SM. Oval highlights the area where the data from most of the crystal structures are clustered (points overlap each other). Points that are outside the major cluster are labelled by pdb entry code. Larger green point highlights tetranucleosome structure (25); magenta hexagon point is for the one of the two NCP-NCP stacks in the 12-187 nucleosome array reported in the recent cryo-EM study (26); this point is not calculated using approach proposed in the present work but plotted using the values reported in the cited paper. Points in the range of NCP-NCP distance 80-110 Å are obtained for the NCP-protein crystals where NCPs are separated from each other.

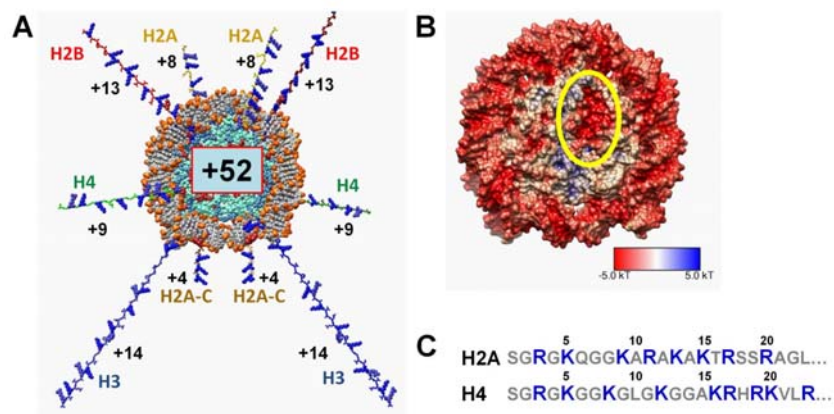

**Figure S7.** The NCP as a negatively charged polycation-polyanion complex. **(A).** Distribution of the basic amino acids in the NCP. The histone tails (shown in their stretched conformation) carry the major part of the positive charge (indicated for each tail); the net charge of the HO globular part is shown in cyan box. **(B).** The electrostatic potential of the NCP calculated for its structured part (tails are excluded). The location of the H2A/H2B acidic patch is indicated by a yellow oval. The adaptive Poisson-Boltzmann Solver (27) included into the Chimera visualization software (28) was used to calculate the surface potential using the following parameters: temperature 298 K, solvent radius 1.4 Å, 150 mM KCl. **(C).** The sequence of the H2A and H4 histone tails. Positively charged Lys and Arg are highlighted by larger blue font.

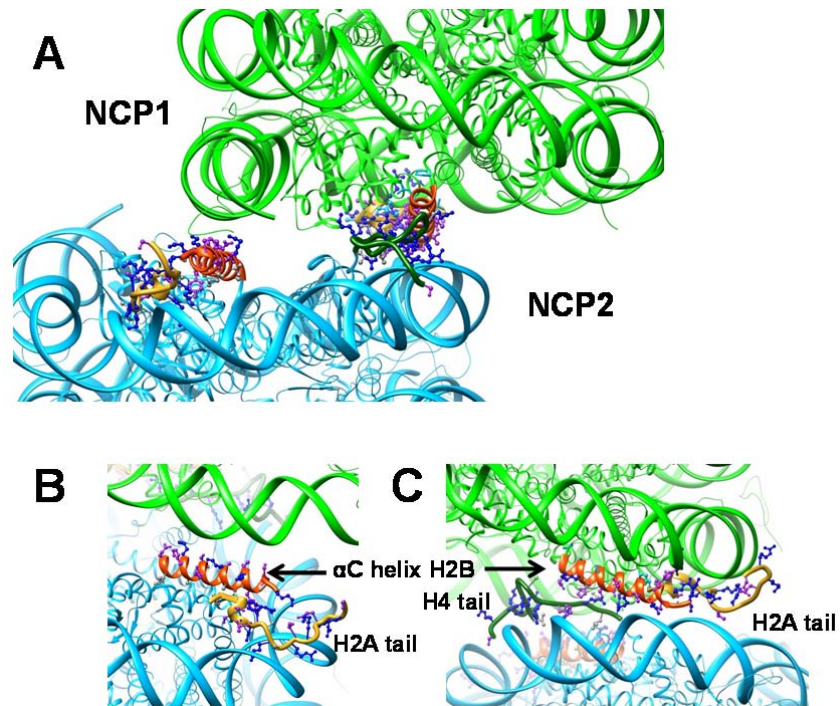

**Figure S8.** Most frequent structural arrangement of screening DNA-DNA repulsion between stacked nucleosomes in the NCP crystals. The 1KX5 structure (11) was used for illustration. **(A)**. There are two areas where dsDNA of the two stacked NCPs (NCP1 is green, NCP2 is sky blue) are close to each other and in both cases the  $\alpha$ C helices of the H2B histones (shown in orange) are located between the DNA surfaces. **(B)**. Structure of the DNA-DNA contact shown in **(A)** on the left hand side. In addition to the H2B  $\alpha$ C helix of NCP2 which is close to the DNA of NCP1, N-terminal of the NCP2 H2A histone (coloured yellow) screens the DNA of its own NCP. **(C)**. Structure of the DNA-DNA contact shown in **(A)** on the right hand side. The H2B  $\alpha$ C helix of NCP2, the histone tails of H2A (from NCP1, shown in yellow) and H4 (from NCP2, dark green) take part in screening DNA-DNA repulsion. The H2A (NCP1) and H4 (NCP2) tails interact with the DNA of its own NCP. In all cartoons, side chain atoms of the amino acids belonging to the highlighted histone domains are shown with atoms of positive lysine and arginine a.a. coloured blue and polar a.a. in purple. Note, that only part of the atoms in the histone tails of the 1KX5 structure has been assigned non-zero occupancies; and atoms of many residues at the ends of the N-termini have high thermal factors. Zero occupancy and/or high thermal factor both indicate dynamic nature of the tails in the NCP crystals.

### III. Supporting Tables

**Table S1.** Charged amino acids in the histone octamer, (H3/H4)<sub>2</sub> tetramer, H2A/H2B dimer, in the histone structured domain (core) and in the tails.

| Histones                      | Number of a. a. | Net charge (Lys, Arg; Asp, Glu) | Charge per a. a. |
|-------------------------------|-----------------|---------------------------------|------------------|
| Octamer                       | 974             | +148 (+114,+106; -24,-48)       | +0.15            |
| Tetramer (H3/H4) <sub>2</sub> | 474             | +76 (+48,+64;-14,-22)           | +0.16            |
| Dimer (H2A/H2B)               | 250             | +36 (+33, +21, -5,-13)          | +0.14            |
| Structured core               | 712             | +52 (+46,+72; -22,-44)          | +0.073           |
| Histone tails                 | 262             | +96 (+68, +34, -2, -4)          | +0.37            |
| H2A (1-20)                    | 20              | +8 (+4, +4; -0, -0)             | +0.40            |
| H2A-C (117-128)               | 12              | +4 (+5, +0; -0, -1)             | +0.33            |
| H2B (1-33)                    | 33              | +13 (+12, +3; -1, -1)           | +0.39            |
| H3 (1-43)                     | 43              | +14 (+8, +6; -0, -0)            | +0.33            |
| H4 (1-23)                     | 23              | +9 (+5, +4; -0, -0)             | +0.39            |

**Table S2.** Basic information about published crystal structures with containing nucleosome core particle.

| No | PDB code | Resolution, Å | DNA                         | Histones                                                                            | Notes | Reference |
|----|----------|---------------|-----------------------------|-------------------------------------------------------------------------------------|-------|-----------|
| 1  | 1AOI     | 2.8           | 146 bp, $\alpha$ -satellite | <i>X. laevis</i>                                                                    |       | (29)      |
| 2  | 1EQZ     | 2.5           | 146 bp, palindromic         | Erythrocytes, <i>G. gallus</i>                                                      |       | (30)      |
| 3  | 1F66     | 2.6           | 146 bp, palindromic         | H2A.Z, <i>H. sapiens</i> ;<br>H2B, H3, <i>X. laevis</i> ;<br>H4, <i>M. musculus</i> |       | (31)      |
| 4  | 1ID3     | 3.1           | 146 bp, palindromic         | <i>S. cerevisiae</i>                                                                |       | (32)      |
| 5  | 1KX3     | 2.0           | 146 bp, palindromic         | <i>X. laevis</i>                                                                    |       | (11)      |
| 6  | 1KX4     | 2.6           | 146 bp, palindromic         | <i>X. laevis</i>                                                                    |       |           |
| 7  | 1KX5     | 1.94          | 147 bp, palindromic         | <i>X. laevis</i>                                                                    |       |           |
| 8  | 1M18     | 2.45          | 146 bp, palindromic         | <i>X. laevis</i>                                                                    |       | (33)      |
| 9  | 1M19     | 2.30          | 146 bp, palindromic         | <i>X. laevis</i>                                                                    |       |           |
| 10 | 1M1A     | 2.65          | 146 bp, palindromic         | <i>X. laevis</i>                                                                    |       |           |
| 11 | 1P34     | 2.7           | 146 bp, $\alpha$ -satellite | <i>X. laevis</i>                                                                    |       | (34)      |
| 12 | 1P3A     | 3.0           | 146 bp, $\alpha$ -satellite | <i>X. laevis</i>                                                                    |       |           |
| 13 | 1P3B     | 3.0           | 146 bp, $\alpha$ -satellite | <i>X. laevis</i>                                                                    |       |           |
| 14 | 1P3F     | 2.9           | 146 bp, $\alpha$ -satellite | <i>X. laevis</i>                                                                    |       |           |
| 15 | 1P3G     | 2.7           | 146 bp, $\alpha$ -satellite | <i>X. laevis</i>                                                                    |       |           |

|    |      |      |                                       |                                                                                 |                    |        |
|----|------|------|---------------------------------------|---------------------------------------------------------------------------------|--------------------|--------|
| 16 | 1P3I | 2.3  | 146 bp, $\alpha$ -satellite           | <i>X. laevis</i>                                                                |                    |        |
| 17 | 1P3K | 2.9  | 146 bp, $\alpha$ -satellite           | <i>X. laevis</i>                                                                |                    |        |
| 18 | 1P3L | 2.4  | 146 bp, $\alpha$ -satellite           | <i>X. laevis</i>                                                                |                    |        |
| 19 | 1P3M | 2.9  | 146 bp, $\alpha$ -satellite           | <i>X. laevis</i>                                                                |                    |        |
| 20 | 1P3O | 2.75 | 146 bp, $\alpha$ -satellite           | <i>X. laevis</i>                                                                |                    |        |
| 21 | 1P3P | 2.7  | 146 bp, $\alpha$ -satellite           | <i>X. laevis</i>                                                                |                    |        |
| 22 | 1S32 | 2.05 | 146 bp, $\alpha$ -satellite           | <i>X. laevis</i>                                                                |                    | (35)   |
| 23 | 1U35 | 3.0  | 146 bp, $\alpha$ -satellite           | H2B, H3, H4 <i>M. musculus</i> ; macroH2A <i>H. sapiens</i> ,                   |                    | (36)   |
| 24 | 1ZBB | 9.0; | 4-167-601 sequence                    | <i>X. laevis</i>                                                                | tetrasome          | (25)   |
| 25 | 1ZLA | 2.9, | 146 bp, $\alpha$ -satellite           | <i>X. laevis</i>                                                                | LANA protein       | (37)   |
| 26 | 2CV5 | 2.5  | 146 bp, palindromic                   | <i>H. sapiens</i> ;                                                             |                    | (38)   |
| 27 | 2F8N | 2.9  | 146 bp, $\alpha$ -satellite           | H3, H4 <i>X. laevis</i> ; H2B <i>M. musculus</i> ; macroH2A <i>H. sapiens</i> , |                    | No ref |
| 28 | 2FJ7 | 3.2  | Synthetic, 16 A/T bp                  | <i>X. laevis</i>                                                                |                    | (39)   |
| 29 | 2NQB | 2.3  | 146 bp, $\alpha$ -satellite           | <i>D. melanogaster</i>                                                          |                    | No ref |
| 30 | 2Nzd | 2.65 | 145 bp, 601                           | <i>X. laevis</i>                                                                |                    | (40)   |
| 31 | 2PYO | 2.43 | 147 bp, $\alpha$ -satellite           | <i>D. melanogaster</i>                                                          |                    | (41)   |
| 32 | 3A6N | 2.7  | 146 bp, synthetic                     | <i>H. sapiens</i>                                                               | testis specific H3 | (42)   |
| 33 | 3AFA | 2.5  | 146 bp, synthetic                     | <i>H. sapiens</i>                                                               |                    |        |
| 34 | 3AN2 | 3.6  | 147 bp, synthetic                     | <i>H. sapiens</i>                                                               | CENP-A             | (43)   |
| 35 | 3AV1 | 2.5  | 146 bp, palindromic                   | <i>H. sapiens</i> ;                                                             |                    | (44)   |
| 36 | 3AV2 | 2.8  | 146 bp, palindromic                   | <i>H. sapiens</i> ;                                                             |                    |        |
| 37 | 3AYW | 2.9  | 146 bp, synthetic                     | <i>H. sapiens</i>                                                               | H3K56Q             |        |
| 38 | 3AZE | 3.0  | 146 bp, synthetic                     | <i>H. sapiens</i>                                                               | H3K64Q             |        |
| 39 | 3AZF | 2.7  | 146 bp, synthetic                     | <i>H. sapiens</i>                                                               | H3K79Q             |        |
| 40 | 3AZG | 2.4  | 146 bp, synthetic                     | <i>H. sapiens</i>                                                               | H3K115Q            |        |
| 41 | 3AZH | 3.49 | 146 bp, synthetic                     | <i>H. sapiens</i>                                                               | H3K122Q            |        |
| 42 | 3AZI | 2.7  | 146 bp, synthetic                     | <i>H. sapiens</i>                                                               | H4K31Q             | (45)   |
| 43 | 3AZJ | 2.89 | 146 bp, synthetic                     | <i>H. sapiens</i>                                                               | H4K44Q             |        |
| 44 | 3AZK | 3.2  | 146 bp, synthetic                     | <i>H. sapiens</i>                                                               | H4K59Q             |        |
| 45 | 3AZL | 2.7  | 146 bp, synthetic                     | <i>H. sapiens</i>                                                               | H4K77Q             |        |
| 46 | 3AZM | 2.89 | 146 bp, synthetic                     | <i>H. sapiens</i>                                                               | H4K79Q             |        |
| 47 | 3AZN | 3.0  | 146 bp, synthetic                     | <i>H. sapiens</i>                                                               | H4K91Q             |        |
| 48 | 3B6F | 3.45 | 147 bp, palindromic                   | <i>X. laevis</i>                                                                | cisplatin          | (46)   |
| 49 | 3B6G | 3.45 | 147 bp, palindromic                   | <i>X. laevis</i>                                                                | oxaliplatin        |        |
| 50 | 3C1B | 2.2  | 146 bp, $\alpha$ -satellite           | <i>X. laevis</i>                                                                | H3K79Me2           | (47)   |
| 51 | 3C1C | 3.15 | 146 bp, $\alpha$ -satellite           | <i>X. laevis</i>                                                                | H4K20Me3           |        |
| 52 | 3KUY | 2.9  | 145 bp, 601                           | <i>X. laevis</i>                                                                |                    | (48)   |
| 53 | 3KWQ | 3.15 | 146 bp, $\alpha$ -satellite           | <i>X. laevis</i>                                                                | H3K56Q             | (49)   |
| 54 | 3KXB | 3.2  | 146 bp, $\alpha$ -satellite           | <i>X. laevis</i>                                                                | H3K56Q             |        |
| 55 | 3LEL | 2.95 | 147 bp, $\alpha$ -satellite, modified | <i>X. laevis</i>                                                                |                    | (50)   |
| 56 | 3LJA | 2.75 | 147 bp, $\alpha$ -satellite, modified | <i>X. laevis</i>                                                                |                    | (51)   |
| 57 | 3LZ0 | 2.5  | 145 bp, 601                           | <i>X. laevis</i>                                                                |                    | (52)   |

|    |      |      |                              |                                                               |                                         |      |
|----|------|------|------------------------------|---------------------------------------------------------------|-----------------------------------------|------|
| 58 | 3LZ1 | 2.5  | 145 bp, 601                  | <i>X. laevis</i>                                              |                                         |      |
| 59 | 3MGP | 2.44 | 147 bp, $\alpha$ -satellite  | <i>X. laevis</i>                                              | Co2+                                    | (53) |
| 60 | 3MGQ | 2.65 | 147 bp, $\alpha$ -satellite  | <i>X. laevis</i>                                              | Ni2+                                    |      |
| 61 | 3MGR | 2.30 | 147 bp, $\alpha$ -satellite  | <i>X. laevis</i>                                              | Rb+                                     |      |
| 62 | 3MGS | 3.15 | 147 bp, $\alpha$ -satellite  | <i>X. laevis</i>                                              | Cs+                                     |      |
| 63 | 3MNN | 2.5  | 145 bp, palindromic          | <i>X. laevis</i>                                              | Ru-agent                                | (54) |
| 64 | 3MVD | 2.9  | 147 bp, 601                  | <i>X. laevis</i>                                              | RCC1                                    | (55) |
| 65 | 3O62 | 3.22 | 146 bp, synthetic            | <i>X. laevis</i>                                              | Pt-agent                                | (56) |
| 66 | 3REH | 2.5  | 145 bp, $\alpha$ -satellite  | <i>X. laevis</i>                                              |                                         | (57) |
| 67 | 3REI | 2.65 | 145 bp, $\alpha$ -satellite  | <i>X. laevis</i>                                              | Pt-agent                                |      |
| 68 | 3REJ | 2.55 | 146 bp, $\alpha$ -satellite  | <i>X. laevis</i>                                              |                                         |      |
| 69 | 3REK | 2.6  | 146 bp, $\alpha$ -satellite  | <i>X. laevis</i>                                              | oxaliplatin                             |      |
| 70 | 3REL | 2.7  | 146 bp, $\alpha$ -satellite  | <i>X. laevis</i>                                              | Pt-complex                              |      |
| 71 | 3TU4 | 3.0  | 147 bp, 601                  | <i>X. laevis</i>                                              | Sir3 domain                             | (58) |
| 72 | 3UT9 | 2.2  | 147 bp, 601L                 | <i>X. laevis</i>                                              |                                         | (59) |
| 73 | 3UTA | 2.07 | 145 bp, $\alpha$ -satellite, | <i>X. laevis</i>                                              | TTAAA                                   |      |
| 74 | 3UTB | 2.2  | 146 bp, $\alpha$ -satellite  | <i>X. laevis</i>                                              |                                         |      |
| 75 | 3W96 | 3.0  | 146 bp, palindromic          | <i>H. sapiens</i>                                             | gH2A                                    | (60) |
| 76 | 3W97 | 3.2  | 146 bp, palindromic          | <i>H. sapiens</i>                                             | gH2B                                    |      |
| 77 | 3W98 | 3.42 | 146 bp, palindromic          | <i>H. sapiens</i>                                             | gH3                                     |      |
| 78 | 3W99 | 3.0  | 146 bp, palindromic          | <i>H. sapiens</i>                                             | gH4                                     |      |
| 79 | 3WA9 | 3.07 | 146 bp, palindromic          | <i>H. sapiens</i>                                             | H2A.Z1                                  | (61) |
| 80 | 3WAA | 3.2  | 146 bp, palindromic          | <i>H. sapiens</i>                                             | H2A.Z2                                  |      |
| 81 | 3WKJ | 2.8  | 145 bp, palindromic          | <i>H. sapiens</i>                                             | testis H2B                              | (62) |
| 82 | 3wtp | 2.67 | 146 bp, palindromic          | <i>H. sapiens</i>                                             | CENP                                    | (63) |
| 83 | 3x1s | 2.81 | 146 bp, synthetic            | <i>H. sapiens</i> ;                                           |                                         | (64) |
| 84 | 3x1t | 2.81 | 146 bp, synthetic            | H3, H4 <i>H. sapiens</i> ;<br>H2A, H2B <i>M. musculus</i> ,   | H2A, H2B testis<br><i>M. musculus</i> , |      |
| 85 | 3x1u | 3.25 | 146 bp, synthetic            | H2B, H3, H4 <i>H. sapiens</i> ;<br>H2A <i>M. musculus</i> ,   | H2A testis <i>M. musculus</i> ,         |      |
| 86 | 3x1v | 2.92 | 146 bp, synthetic            | H2A, H3, H4 <i>H. sapiens</i> ;<br>H2B <i>M. musculus</i> ,   | H2B testis <i>M. musculus</i> ,         |      |
| 87 | 4J8U | 2.38 | 145 bp, synthetic            | <i>X. laevis</i>                                              | Os-complex                              | (65) |
| 88 | 4J8V | 2.58 | 145 bp, synthetic            | <i>X. laevis</i>                                              | Ru-complex                              |      |
| 89 | 4J8W | 2.41 | 145 bp, synthetic            | <i>X. laevis</i>                                              | Os-complex                              |      |
| 90 | 4J8X | 2.87 | 145 bp, synthetic            | <i>X. laevis</i>                                              | Ru-complex                              |      |
| 91 | 4JJN | 3.09 | 146 bp, synthetic            | <i>S. cerevisiae</i>                                          | Sir3                                    | (66) |
| 92 | 4KGC | 2.09 | 145 bp, synthetic            | <i>X. laevis</i>                                              | Ru-complex                              | (67) |
| 93 | 4KUD | 3.2  | 146 bp, synthetic            | <i>S. cerevisiae</i>                                          | Sir3 domain                             | (68) |
| 94 | 4LD9 | 3.31 | 146 bp, 601                  | <i>X. laevis</i>                                              | Sir3 domain                             | (69) |
| 95 | 4QLC | 3.2  | 167 bp, 601                  | H3, H4 <i>H. sapiens</i> ;<br>H2A, H2B <i>D. melanogaster</i> | chromatosome                            | (70) |
| 96 | 4R8P | 3.31 | 147 bp, 601                  | <i>X. laevis</i>                                              | PRC1 domain                             | (71) |
| 97 | 4wu8 | 2.45 | 145 bp, synthetic            | <i>X. laevis</i>                                              | Pt-intercalator                         | (72) |

|     |      |      |                             |                        |                                          |      |
|-----|------|------|-----------------------------|------------------------|------------------------------------------|------|
| 98  | 4wu9 | 2.60 | 145 bp, synthetic           | <i>X. laevis</i>       | Pt-intercalator                          |      |
| 99  | 4x23 | 3.5  | 147 bp, 601                 | <i>D. melanogaster</i> | CENP-C                                   | (73) |
| 100 | 4xuj | 3.18 | 145 bp, synthetic           | <i>X. laevis</i>       | Ru-complex                               | (74) |
| 101 | 4xzq | 2.40 | 147 bp, $\alpha$ -satellite | <i>X. laevis</i>       | H3 K115Ac                                | (75) |
| 102 | 4ym5 | 4.01 | 144 bp, $\alpha$ -satellite | <i>H. sapiens</i>      | Pyrimidine-pyrimidine (6-4) photoproduct | (76) |
| 103 | 4ym6 | 3.51 | 145 bp, $\alpha$ -satellite | <i>H. sapiens</i>      |                                          |      |
| 104 | 4ys3 | 3.00 | 147 bp, $\alpha$ -satellite | <i>X. laevis</i>       |                                          | (75) |
| 105 | 4Z5T | 2.80 | 146 bp, $\alpha$ -satellite | <i>H. sapiens</i>      | Testis H3.5                              | (77) |
| 106 | 4zux | 3.82 | 145 bp, $\alpha$ -satellite | <i>X. laevis</i>       | Complex with SAGA DUB                    | (78) |
| 107 | 4z66 | 2.50 | 147 bp, $\alpha$ -satellite | <i>X. laevis</i>       |                                          | (75) |
| 108 | 5AV5 | 2.40 | 147 bp, $\alpha$ -satellite | <i>H. sapiens</i>      |                                          | (79) |
| 109 | 5AV6 | 2.20 | 147 bp, $\alpha$ -satellite |                        |                                          |      |
| 110 | 5AV8 | 2.20 | 147 bp, $\alpha$ -satellite |                        |                                          |      |
| 111 | 5AV9 | 2.20 | 147 bp, $\alpha$ -satellite |                        |                                          |      |
| 112 | 5AVB | 2.40 | 147 bp, $\alpha$ -satellite |                        |                                          |      |
| 113 | 5AVC | 2.40 | 147 bp, $\alpha$ -satellite |                        |                                          |      |
| 114 | 5ay8 | 2.80 | 146 bp, $\alpha$ -satellite | <i>H. sapiens</i>      | H3.Y histone                             | (80) |
| 115 | 5b0y | 2.56 | 146 bp, $\alpha$ -satellite | <i>H. sapiens</i>      | crotonylated H3 K122                     | (81) |
| 116 | 5b0z | 1.99 | 146 bp, $\alpha$ -satellite | <i>H. sapiens</i>      |                                          |      |
| 117 | 5b1l | 2.35 | 146 bp, $\alpha$ -satellite | <i>M. Musculus</i>     | Mouse testis specific H3T                | (82) |
| 118 | 5b1m | 2.34 | 146 bp, $\alpha$ -satellite | <i>M. Musculus</i>     | Histones from mouse                      |      |
| 119 | 5b24 | 3.60 | 145 bp, $\alpha$ -satellite | <i>H. sapiens</i>      | Cyclobutane pyrimidine dimer             | (83) |
| 120 | 5b2i | 3.00 | 146 bp, $\alpha$ -satellite | <i>H. sapiens</i>      |                                          | (84) |
| 121 | 5b2j | 2.60 | 146 bp, $\alpha$ -satellite | <i>H. sapiens</i>      | Methylated DNA                           |      |
| 122 | 5b31 | 2.20 | 146 bp, $\alpha$ -satellite | <i>H. sapiens</i>      | H2A + H2A.Z                              | (85) |
| 123 | 5b32 | 2.35 | 146 bp, $\alpha$ -satellite | <i>H. sapiens</i>      | H2A + H2A.Z                              |      |
| 124 | 5b33 | 2.93 | 146 bp, $\alpha$ -satellite | <i>H. sapiens</i>      | H2A.Z                                    |      |
| 125 | 5b40 | 3.33 | 146 bp, $\alpha$ -satellite | <i>H. sapiens</i>      | Monoubiquitinated H2B K120 and H4 K31    | (86) |
| 126 | 5cp6 | 2.60 | 145 bp, synthetic           | <i>X. laevis</i>       | Adduct of anticancer drug                | (87) |
| 127 | 5CPI | 2.9  | 146 bp, 2 satellite         | <i>H. sapiens</i>      |                                          | (88) |
| 128 | 5CPJ | 3.15 | 146 bp, 2 satellite         | <i>H. sapiens</i>      | Methylated DNA                           |      |
| 129 | 5CPK | 2.6  | 146 bp, 2 satellite         | <i>H. sapiens</i>      | Methylated DNA                           |      |
| 130 | 5dnm | 2.81 | 145 bp, synthetic           | <i>X. laevis</i>       | Ru(II) complex                           | (89) |
| 131 | 5dnn | 2.80 | 145 bp, synthetic           | <i>X. laevis</i>       | Ru(II) + Au(I) complexes                 |      |
| 132 | 5e5a | 2.81 | 146 bp, $\alpha$ -satellite | <i>X. laevis</i>       | Cytomegalovirus IE1 protein              | (90) |
| 133 | 5f99 | 2.63 | 147 bp MMTV-A               | <i>X. laevis</i>       |                                          | (91) |



|     |      |      |                             |                   |                                     |       |
|-----|------|------|-----------------------------|-------------------|-------------------------------------|-------|
| 134 | 5gse | 3.14 | 250 bp, synthetic           | <i>H. sapiens</i> | Overlapping hexasome and octasome   | (92)  |
| 135 | 5gsu | 3.10 | 146 bp, $\alpha$ -satellite | <i>H. sapiens</i> | human testis-specific histone hTh2b | (93)  |
| 136 | 5gt0 | 2.82 | 146 bp, $\alpha$ -satellite | <i>H. sapiens</i> | human testis-specific histone hTh2a |       |
| 137 | 5gt3 | 2.91 | 146 bp, $\alpha$ -satellite | <i>H. sapiens</i> | human testis-specific histone hTh2b |       |
| 138 | 5gtc | 2.70 | 146 bp, $\alpha$ -satellite | <i>H. sapiens</i> | DMAP-SH conjugate with LANA         | (94)  |
| 139 | 5gxq | 2.85 | 146 bp, $\alpha$ -satellite | <i>H. sapiens</i> | H3.6 histone variant                | (95)  |
| 140 | 5hq2 | 4.50 | 149 bp 601                  | <i>X. laevis</i>  | H4 K20 methyltransferase + PR/SET07 | (96)  |
| 141 | 5jrg | 2.50 | 145 bp, synthetic           | <i>H. sapiens</i> | aprimidinic site, tetrahydrofuran   | (97)  |
| 142 | 5kgf | 4.50 | 145 bp, synthetic           | <i>X. laevis</i>  | EM structure, P53-binding protein   | (98)  |
| 143 | 5mlu | 2.80 | 145 bp 601                  | <i>X. laevis</i>  | Complex with spumavirus GAG         | (99)  |
| 144 | 5nl0 | 5.40 | 197-bp palindromic 601L     | <i>H. sapiens</i> | Complex with linker histone H1      | (100) |
| 145 | 5x0x | 3.97 | 167 bp, synthetic           | <i>X. laevis</i>  | Complex with Snf2                   | (101) |
| 146 | 5x0y | 4.69 | 167 bp, synthetic           | <i>X. laevis</i>  | Complex with Snf2                   |       |
| 147 | 5x7x | 2.18 | 146 bp, $\alpha$ -satellite | <i>H. sapiens</i> | Human H3.3                          | (95)  |

**Table S3.** Parameters of the DNA structure in the published NCP crystal structures. Values of radius, pitch, number of base pairs, average curvature angle per bp and average superhelix rise per bp were calculated from the double DNA helix axis path of the central 129 bp of DNA.

| No | PDB code | Length, bp | Contour length, Å | Curvature, degrees | SH radius, Å | SH pitch, Å | bp per turn | Angle/bp step, degrees |           | SH rise/bp step, Å |            | Centre-centre, Å |
|----|----------|------------|-------------------|--------------------|--------------|-------------|-------------|------------------------|-----------|--------------------|------------|------------------|
|    |          |            |                   |                    |              |             |             | mean                   | min/max   | mean               | min/max    |                  |
| 1  | 1AOI     | 146        | 485.4             | 666                | 39.8         | 25.3        | 77.7        | 4.70                   | 2.73/6.86 | 0.330              | -0.43/1.26 | 4.03             |
| 2  | 1EQZ     | 146        | 483.3             | 667                | 39.7         | 25.4        | 77.7        | 4.69                   | 2.58/6.97 | 0.331              | -0.40/1.22 | 4.96             |
| 3  | 1F66     | 146        | 487.5             | 666                | 39.9         | 25.5        | 77.7        | 4.70                   | 2.72/7.95 | 0.333              | -0.70/1.09 | 7.72             |
| 4  | 1ID3     | 146        | 488.6             | 665                | 40.1         | 25.9        | 77.7        | 4.69                   | 2.53/7.27 | 0.338              | -0.69/1.03 | 3.29             |
| 5  | 1KX3     | 146        | 483.2             | 666                | 39.6         | 25.2        | 77.7        | 4.70                   | 2.71/6.24 | 0.329              | -0.54/1.33 | 4.09             |
| 6  | 1KX4     | 146        | 483.2             | 666                | 39.6         | 26.2        | 78.0        | 4.67                   | 2.76/7.21 | 0.340              | -0.58/0.89 | 3.45             |
| 7  | 1KX5     | 147        | 483.9             | 667                | 39.7         | 24.9        | 78.6        | 4.64                   | 2.73/6.68 | 0.321              | -0.44/1.22 | 4.07             |
| 8  | 1M18     | 146        | 487.6             | 666                | 40.1         | 25.4        | 78.2        | 4.66                   | 2.70/6.85 | 0.329              | -0.42/1.41 | 8.09             |
| 9  | 1M19     | 146        | 487.3             | 667                | 40.1         | 25.3        | 78.2        | 4.67                   | 2.80/6.47 | 0.328              | -0.53/1.36 | 8.03             |
| 10 | 1M1A     | 146        | 486.7             | 664                | 39.9         | 25.6        | 78.2        | 4.66                   | 2.12/6.64 | 0.331              | -0.83/1.22 | 8.28             |
| 11 | 1P34     | 146        | 486.7             | 666                | 39.9         | 25.2        | 77.6        | 4.70                   | 2.83/6.07 | 0.329              | -0.59/1.29 | 8.35             |
| 12 | 1P3A     | 146        | 485.0             | 666                | 39.8         | 25.1        | 77.7        | 4.70                   | 2.67/6.34 | 0.327              | -0.45/1.44 | 8.23             |
| 13 | 1P3B     | 146        | 485.4             | 666                | 39.7         | 25.1        | 77.6        | 4.70                   | 2.65/6.81 | 0.328              | -0.52/1.50 | 8.08             |
| 14 | 1P3F     | 146        | 484.5             | 666                | 39.6         | 25.1        | 77.6        | 4.70                   | 2.65/6.71 | 0.327              | -0.64/1.40 | 8.21             |
| 15 | 1P3G     | 146        | 486.4             | 666                | 39.8         | 25.1        | 77.6        | 4.70                   | 2.69/6.37 | 0.327              | -0.49/1.27 | 8.21             |
| 16 | 1P3I     | 146        | 487.2             | 666                | 39.9         | 25.2        | 77.6        | 4.70                   | 2.76/6.58 | 0.329              | -0.46/1.34 | 8.31             |
| 17 | 1P3K     | 146        | 484.4             | 667                | 39.7         | 25.0        | 77.7        | 4.69                   | 2.85/6.41 | 0.325              | -0.35/1.33 | 8.17             |
| 18 | 1P3L     | 146        | 487.4             | 666                | 40.0         | 25.0        | 77.7        | 4.69                   | 2.62/7.13 | 0.326              | -0.46/1.25 | 8.26             |
| 19 | 1P3M     | 146        | 487.4             | 666                | 40.0         | 25.0        | 77.7        | 4.69                   | 2.81/6.87 | 0.326              | -0.40/1.13 | 8.24             |
| 20 | 1P3O     | 146        | 485.0             | 666                | 39.8         | 25.0        | 77.7        | 4.70                   | 2.77/6.53 | 0.327              | -0.47/1.38 | 8.26             |
| 21 | 1P3P     | 146        | 484.9             | 666                | 39.8         | 25.0        | 77.7        | 4.70                   | 2.76/6.54 | 0.326              | -0.39/1.34 | 8.24             |
| 22 | 1S32     | 146        | 487.2             | 666                | 40.0         | 24.7        | 77.6        | 4.70                   | 2.46/7.48 | 0.323              | -0.63/1.39 | 8.13             |
| 23 | 1U35     | 145        | 484.7             | 666                | 39.8         | 25.6        | 77.47       | 4.71                   | 2.73/7.22 | 0.334              | -0.53/1.06 | 7.60             |
| 24 | 1ZBB     | 150        | 495.0             | 674                | 39.6         | 24.9        | 78.6        | 4.64                   | 2.49/6.64 | 0.321              | -1.04/1.25 | 4.41             |

|    |      |     |       |     |      |      |      |      |           |       |            |      |
|----|------|-----|-------|-----|------|------|------|------|-----------|-------|------------|------|
|    |      | 144 | 476.2 | 657 | 39.6 | 24.9 | 78.6 | 4.64 | 2.45/6.66 | 0.321 | -0.54/1.28 | 5.66 |
| 25 | 1ZLA | 146 | 486.8 | 667 | 39.8 | 25.1 | 77.6 | 4.70 | 2.92/7.40 | 0.327 | -0.50/1.48 | 8.16 |
| 26 | 2CV5 | 146 | 483.7 | 667 | 39.7 | 26.0 | 77.8 | 4.69 | 2.52/6.62 | 0.338 | -0.40/0.96 | 3.62 |
| 27 | 2F8N | 145 | 485.3 | 665 | 39.8 | 25.6 | 77.6 | 4.70 | 2.38/7.35 | 0.335 | -0.42/1.26 | 7.92 |
| 28 | 2FJ7 | 147 | 486.5 | 666 | 39.6 | 25.2 | 78.6 | 4.64 | 2.61/6.80 | 0.325 | -0.75/1.40 | 4.15 |
| 29 | 2NQB | 146 | 486.9 | 665 | 39.9 | 25.4 | 77.6 | 4.70 | 1.73/7.31 | 0.332 | -0.57/1.35 | 4.26 |
| 30 | 2NZD | 145 | 485.5 | 665 | 39.8 | 25.0 | 76.9 | 4.74 | 2.42/6.81 | 0.330 | -0.46/1.09 | 3.86 |
| 31 | 2PYO | 147 | 483.7 | 666 | 39.7 | 25.1 | 78.5 | 4.64 | 2.74/6.58 | 0.323 | -0.41/1.21 | 4.14 |
| 32 | 3A6N | 145 | 481.4 | 665 | 39.6 | 25.5 | 77.9 | 4.68 | 2.72/6.82 | 0.331 | -0.55/1.19 | 3.60 |
| 33 | 3AFA | 146 | 483.5 | 667 | 39.8 | 25.7 | 78.0 | 4.68 | 2.31/6.39 | 0.334 | -0.42/1.19 | 3.57 |
| 34 | 3AN2 | 121 | 407.4 | 580 | 39.6 | 25.9 | 77.9 | 4.68 | 2.72/7.51 | 0.337 | -0.56/1.09 | 5.16 |
| 35 | 3AV1 | 146 | 484.6 | 667 | 39.9 | 25.6 | 78.0 | 4.68 | 2.34/6.42 | 0.333 | -0.39/1.09 | 3.61 |
| 36 | 3AV2 | 146 | 485.4 | 667 | 39.9 | 25.8 | 77.9 | 4.68 | 2.31/6.58 | 0.335 | -0.45/1.11 | 3.58 |
| 37 | 3AYW | 142 | 475.3 | 657 | 39.9 | 25.5 | 77.9 | 4.68 | 1.49/7.64 | 0.332 | -0.52/1.38 | 3.53 |
| 38 | 3AZE | 145 | 483.8 | 664 | 39.8 | 25.4 | 77.8 | 4.68 | 2.19/8.79 | 0.331 | -0.47/1.02 | 3.65 |
| 39 | 3AZF | 145 | 484.5 | 666 | 39.8 | 25.6 | 77.9 | 4.68 | 2.86/8.66 | 0.333 | -0.87/1.30 | 3.66 |
| 40 | 3AZG | 145 | 484.6 | 665 | 39.9 | 25.5 | 77.9 | 4.68 | 2.73/6.62 | 0.332 | -0.39/1.29 | 3.69 |
| 41 | 3AZH | 145 | 485.2 | 664 | 40.0 | 25.7 | 77.9 | 4.68 | 2.48/6.66 | 0.334 | -0.85/1.30 | 3.68 |
| 42 | 3AZI | 145 | 486.3 | 666 | 40.0 | 25.5 | 77.8 | 4.69 | 1.87/8.32 | 0.333 | -0.51/1.10 | 3.61 |
| 43 | 3AZJ | 145 | 483.6 | 665 | 39.8 | 25.5 | 78.0 | 4.68 | 2.39/6.54 | 0.332 | -0.53/1.20 | 3.66 |
| 44 | 3AZK | 145 | 484.3 | 666 | 39.9 | 25.6 | 77.9 | 4.68 | 2.45/7.56 | 0.333 | -0.42/1.18 | 3.67 |
| 45 | 3AZL | 145 | 484.2 | 665 | 39.9 | 25.4 | 78.0 | 4.68 | 2.76/6.59 | 0.33  | -0.49/1.09 | 3.64 |
| 46 | 3AZM | 145 | 483.7 | 666 | 39.7 | 25.5 | 77.8 | 4.69 | 2.08/6.95 | 0.332 | -0.51/1.23 | 3.60 |
| 47 | 3AZN | 145 | 484.8 | 665 | 39.9 | 25.7 | 77.9 | 4.68 | 2.51/6.41 | 0.334 | -0.42/1.21 | 3.71 |
| 48 | 3B6F | 147 | 491.3 | 667 | 40.1 | 25.3 | 78.5 | 4.64 | 2.42/7.66 | 0.327 | -0.66/1.28 | 4.18 |
| 49 | 3B6G | 147 | 486.9 | 666 | 39.8 | 25.3 | 78.6 | 4.64 | 2.61/7.63 | 0.324 | -1.24/1.38 | 4.09 |
| 50 | 3C1B | 146 | 485.4 | 665 | 39.8 | 25.2 | 77.7 | 4.69 | 2.29/7.21 | 0.328 | -0.68/1.32 | 4.23 |
| 51 | 3C1C | 146 | 490.0 | 666 | 40.1 | 25.4 | 77.7 | 4.70 | 1.34/7.26 | 0.331 | -0.44/1.46 | 4.40 |
| 52 | 3KUY | 145 | 486.3 | 666 | 39.9 | 25.4 | 77.0 | 4.75 | 2.82/8.62 | 0.335 | -0.43/1.19 | 3.81 |

|    |      |     |       |     |      |      |      |      |           |       |            |      |
|----|------|-----|-------|-----|------|------|------|------|-----------|-------|------------|------|
| 53 | 3KWQ | 146 | 486.8 | 666 | 40.0 | 25.1 | 77.7 | 4.69 | 2.56/7.09 | 0.327 | -0.50/1.29 | 4.08 |
| 54 | 3KXB | 146 | 487.0 | 666 | 40.0 | 25.1 | 77.7 | 4.69 | 2.65/7.02 | 0.327 | -0.48/1.23 | 3.95 |
| 55 | 3LEL | 147 | 488.5 | 667 | 40.0 | 25.5 | 78.8 | 4.63 | 2.56/6.49 | 0.327 | -0.52/1.18 | 3.93 |
|    |      | 147 | 489.2 | 666 | 39.9 | 25.2 | 78.7 | 4.63 | 2.58/7.36 | 0.324 | -0.81/1.05 | 5.61 |
| 56 | 3LJA | 147 | 486.5 | 667 | 39.9 | 25.0 | 78.5 | 4.64 | 2.80/6.52 | 0.322 | -0.39/1.21 | 4.19 |
| 57 | 3LZ0 | 145 | 484.3 | 664 | 39.9 | 25.5 | 77.9 | 4.68 | 2.50/6.97 | 0.331 | -0.37/0.94 | 3.32 |
| 58 | 3LZ1 | 145 | 485.3 | 665 | 40.0 | 25.3 | 77.9 | 4.68 | 2.55/8.29 | 0.329 | -0.58/0.94 | 3.41 |
| 59 | 3MGP | 147 | 490.7 | 672 | 39.7 | 25.4 | 77.8 | 4.69 | 1.92/7.05 | 0.331 | -1.57/2.55 | 4.08 |
|    |      | 147 | 491.3 | 672 | 39.7 | 25.3 | 77.6 | 4.70 | 1.93/7.61 | 0.330 | -1.57/1.69 | 4.09 |
| 60 | 3MGQ | 147 | 490.6 | 671 | 39.8 | 25.6 | 77.9 | 4.68 | 2.19/7.30 | 0.333 | -1.59/2.06 | 4.14 |
|    |      | 147 | 491.6 | 673 | 39.8 | 25.4 | 77.6 | 4.70 | 2.19/7.98 | 0.332 | -1.56/1.39 | 4.16 |
| 61 | 3MGR | 147 | 484.8 | 667 | 39.8 | 25.0 | 78.6 | 4.64 | 2.80/6.10 | 0.323 | -0.37/1.05 | 4.07 |
| 62 | 3MGS | 147 | 485.8 | 667 | 39.9 | 25.1 | 78.6 | 4.64 | 2.87/6.26 | 0.323 | -0.37/1.02 | 4.07 |
| 63 | 3MNN | 145 | 485.7 | 666 | 39.9 | 25.3 | 76.8 | 4.75 | 2.74/7.23 | 0.334 | -0.54/1.19 | 3.81 |
| 64 | 3MVD | 146 | 484.2 | 669 | 39.7 | 25.9 | 78.3 | 4.66 | 2.61/6.55 | 0.336 | -0.45/1.47 | 3.40 |
| 65 | 3O62 | 146 | 495.3 | 673 | 39.8 | 25.1 | 76.4 | 4.77 | 2.08/9.67 | 0.333 | -1.21/1.90 | 3.97 |
| 66 | 3REH | 145 | 485.7 | 665 | 39.9 | 24.8 | 76.9 | 4.74 | 2.50/6.91 | 0.327 | -0.49/1.14 | 3.85 |
| 67 | 3REI | 145 | 486.2 | 665 | 39.9 | 24.7 | 76.9 | 4.74 | 2.43/6.83 | 0.325 | -0.43/1.19 | 3.85 |
| 68 | 3REJ | 146 | 484.1 | 666 | 39.7 | 25.9 | 78.0 | 4.68 | 2.56/6.84 | 0.336 | -0.54/1.07 | 3.53 |
| 69 | 3REK | 146 | 483.2 | 666 | 39.6 | 26.0 | 78.0 | 4.68 | 2.56/6.85 | 0.337 | -0.43/1.05 | 3.53 |
| 70 | 3REL | 146 | 483.6 | 669 | 39.7 | 25.9 | 78.0 | 4.68 | 2.40/6.74 | 0.336 | -0.39/0.97 | 3.47 |
| 71 | 3TU4 | 146 | 487.1 | 669 | 39.8 | 25.3 | 78.0 | 4.68 | 2.85/6.12 | 0.329 | -0.59/1.77 | 3.37 |
| 72 | 3UT9 | 145 | 483.3 | 665 | 39.8 | 25.6 | 78.0 | 4.67 | 2.55/6.81 | 0.332 | -0.30/0.82 | 3.39 |
| 73 | 3UTA | 145 | 483.6 | 665 | 39.8 | 25.4 | 77.4 | 4.71 | 2.79/7.29 | 0.332 | -0.27/1.02 | 3.74 |
| 74 | 3UTB | 146 | 483.3 | 666 | 39.7 | 25.8 | 78.0 | 4.68 | 2.74/6.17 | 0.335 | -0.29/0.90 | 3.52 |
| 75 | 3W96 | 145 | 483.5 | 666 | 39.8 | 25.7 | 77.9 | 4.68 | 2.67/6.75 | 0.334 | -0.39/1.16 | 3.43 |
| 76 | 3W97 | 146 | 488.5 | 667 | 40.1 | 25.8 | 77.8 | 4.68 | 2.39/6.33 | 0.335 | -0.59/1.05 | 3.42 |
| 77 | 3W98 | 145 | 482.6 | 665 | 39.8 | 25.7 | 78.0 | 4.68 | 2.67/6.66 | 0.334 | -0.40/1.07 | 3.51 |
| 78 | 3W99 | 145 | 482.9 | 665 | 39.8 | 25.5 | 77.9 | 4.68 | 2.49/7.26 | 0.332 | -0.33/1.12 | 3.50 |

|     |      |     |       |     |      |      |      |      |            |       |            |      |
|-----|------|-----|-------|-----|------|------|------|------|------------|-------|------------|------|
| 79  | 3WA9 | 146 | 485.0 | 667 | 39.8 | 25.3 | 77.9 | 4.68 | 1.87/6.71  | 0.33  | -0.60/1.19 | 3.22 |
| 80  | 3WAA | 146 | 484.0 | 666 | 39.8 | 25.5 | 77.8 | 4.69 | 0.74/6.75  | 0.332 | -0.51/1.14 | 3.13 |
| 81  | 3WKJ | 145 | 484.8 | 665 | 40.0 | 25.5 | 78.0 | 4.68 | 2.77/6.32  | 0.331 | -0.45/1.13 | 3.39 |
| 82  | 3wtp | 146 | 483.4 | 671 | 39.6 | 25.9 | 77.9 | 4.68 | 2.61/5.98  | 0.337 | -0.36/0.95 | 3.51 |
| 83  | 3x1s | 146 | 486.6 | 666 | 39.9 | 25.5 | 77.8 | 4.69 | 0.87/7.31  | 0.332 | -0.90/1.71 | 3.50 |
| 84  | 3x1t | 146 | 484.7 | 667 | 39.9 | 25.5 | 77.9 | 4.68 | 1.91/6.95  | 0.332 | -0.45/1.22 | 3.33 |
| 85  | 3x1u | 146 | 485.5 | 668 | 39.9 | 25.4 | 77.8 | 4.69 | 2.13/7.04  | 0.330 | -0.39/0.99 | 3.41 |
| 86  | 3x1v | 146 | 485.5 | 669 | 39.8 | 25.3 | 77.9 | 4.68 | 2.08/6.39  | 0.328 | -0.32/0.96 | 3.45 |
| 87  | 4J8U | 145 | 486.8 | 665 | 40.0 | 25.0 | 76.9 | 4.75 | 2.66/6.53  | 0.330 | -0.43/1.11 | 3.87 |
| 88  | 4J8V | 145 | 487.4 | 665 | 40.1 | 24.8 | 76.9 | 4.74 | 2.56/6.74  | 0.327 | -0.42/1.09 | 3.87 |
| 89  | 4J8W | 145 | 487.1 | 665 | 40.0 | 24.8 | 76.9 | 4.74 | 2.60/6.62  | 0.327 | -0.48/1.01 | 3.89 |
| 90  | 4J8X | 145 | 485.3 | 665 | 39.9 | 25.1 | 76.9 | 4.74 | 2.50/8.05  | 0.331 | -0.41/1.17 | 3.83 |
| 91  | 4JJN | 146 | 488.0 | 670 | 39.8 | 25.6 | 78.0 | 4.68 | 2.85/6.96  | 0.332 | -0.43/1.11 | 2.81 |
| 92  | 4KGC | 145 | 483.9 | 665 | 39.9 | 25.4 | 77.9 | 4.68 | 2.65/7.04  | 0.331 | -0.37/1.04 | 3.35 |
| 93  | 4KUD | 146 | 485.6 | 667 | 39.8 | 26.3 | 77.8 | 4.69 | 2.74/6.62  | 0.342 | -0.37/0.85 | 3.48 |
| 94  | 4LD9 | 141 | 472.9 | 653 | 39.9 | 25.3 | 77.9 | 4.68 | 2.98/7.47  | 0.329 | -0.44/1.08 | 3.63 |
| 95  | 4QLC | 165 | 550.0 | 700 | 39.9 | 27.0 | 78.0 | 4.68 | 0.59/6.99  | 0.350 | -1.07/1.17 | 3.54 |
| 96  | 4R8P | 144 | 481.8 | 664 | 39.8 | 26.1 | 78.0 | 4.67 | 2.33/7.10  | 0.339 | -0.33/0.88 | 2.96 |
| 97  | 4wu8 | 145 | 486.1 | 666 | 39.9 | 25.2 | 76.8 | 4.75 | 2.33/9.56  | 0.332 | -0.58/1.08 | 3.75 |
| 98  | 4wu9 | 145 | 486.7 | 665 | 39.9 | 25.2 | 76.8 | 4.75 | 2.44/9.36  | 0.332 | -0.49/1.12 | 3.81 |
| 99  | 4x23 | 146 | 486.9 | 670 | 39.8 | 25.7 | 78.3 | 4.66 | 2.95/6.69  | 0.333 | -0.57/1.05 | 3.42 |
|     |      | 146 | 487.9 | 671 | 39.8 | 25.8 | 78.3 | 4.66 | 2.85/7.00  | 0.334 | -0.58/1.06 | 3.41 |
| 100 | 4xuj | 145 | 484.8 | 665 | 39.8 | 25.0 | 76.9 | 4.75 | 2.42/6.93  | 0.329 | -0.57/1.06 | 3.81 |
| 101 | 4xzq | 147 | 485.6 | 667 | 39.9 | 25.0 | 78.6 | 4.64 | 2.88/6.70  | 0.322 | -0.37/1.17 | 4.12 |
| 102 | 4ym5 | 143 | 486.6 | 665 | 40.3 | 25.6 | 77.1 | 4.73 | 2.45/11.18 | 0.337 | -0.32/0.85 | 2.38 |
| 103 | 4ym6 | 144 | 488.3 | 667 | 40.3 | 25.8 | 77.2 | 4.73 | 2.65/9.40  | 0.339 | -0.34/1.32 | 2.45 |
| 104 | 4ys3 | 147 | 487.3 | 667 | 40.0 | 25.0 | 78.6 | 4.64 | 2.88/6.53  | 0.322 | -0.47/1.18 | 4.12 |
| 105 | 4z5t | 146 | 485.6 | 668 | 39.9 | 25.8 | 77.8 | 4.69 | 2.29/7.53  | 0.335 | -0.39/0.90 | 3.33 |
| 106 | 4z66 | 147 | 486.0 | 667 | 39.9 | 25.1 | 78.6 | 4.64 | 2.74/6.73  | 0.323 | -0.32/1.13 | 4.17 |

|     |      |                   |       |     |      |      |      |      |            |       |            |      |
|-----|------|-------------------|-------|-----|------|------|------|------|------------|-------|------------|------|
| 107 | 4zux | 145               | 488.8 | 668 | 40.0 | 26.0 | 77.9 | 4.68 | 2.67/7.78  | 0.338 | -0.51/1.00 | 3.47 |
|     |      | 145               | 488.5 | 668 | 40.0 | 26.2 | 77.9 | 4.68 | 2.79/7.14  | 0.34  | -0.77/1.13 | 4.95 |
| 108 | 5av5 | 147               | 486.5 | 667 | 39.9 | 25.2 | 78.5 | 4.64 | 2.74/6.29  | 0.325 | -0.48/1.02 | 4.03 |
| 109 | 5av6 | 147               | 485.4 | 667 | 39.9 | 25.3 | 78.5 | 4.65 | 2.71/6.54  | 0.327 | -0.47/1.02 | 3.98 |
| 110 | 5av8 | 147               | 485.1 | 667 | 39.9 | 25.3 | 78.5 | 4.65 | 2.64/6.33  | 0.327 | -0.46/1.00 | 4.00 |
| 111 | 5av9 | 147               | 485.3 | 667 | 39.9 | 25.3 | 78.5 | 4.65 | 2.70/6.72  | 0.326 | -0.47/1.02 | 4.00 |
| 112 | 5avb | 147               | 486.1 | 667 | 39.9 | 25.2 | 78.5 | 4.65 | 2.66/6.15  | 0.325 | -0.44/1.02 | 4.02 |
| 113 | 5avc | 147               | 486.8 | 667 | 40.0 | 25.2 | 78.5 | 4.65 | 2.76/6.43  | 0.325 | -0.50/1.02 | 4.03 |
| 114 | 5ay8 | 145               | 485.0 | 667 | 39.9 | 25.9 | 78.2 | 4.67 | 2.19/6.89  | 0.336 | -0.58/1.25 | 3.81 |
| 115 | 5b0y | 146               | 484.2 | 668 | 39.7 | 25.9 | 77.9 | 4.68 | 2.56/6.44  | 0.337 | -0.49/0.88 | 3.46 |
| 116 | 5b0z | 146               | 485.1 | 667 | 39.8 | 25.4 | 77.9 | 4.68 | 2.46/6.24  | 0.330 | -0.38/0.89 | 3.52 |
| 117 | 5b1l | 144               | 477.9 | 665 | 39.6 | 25.7 | 77.8 | 4.69 | 2.57/6.12  | 0.335 | -0.45/1.03 | 3.50 |
| 118 | 5b1m | 146               | 484.9 | 667 | 39.6 | 25.4 | 77.9 | 4.68 | 2.46/5.95  | 0.330 | -1.02/0.86 | 3.57 |
| 119 | 5b24 | 144               | 481.8 | 666 | 39.9 | 25.5 | 77.0 | 4.74 | 2.55/11.72 | 0.335 | -0.29/0.93 | 2.55 |
| 120 | 5b2i | 146               | 488.8 | 666 | 40.1 | 25.6 | 77.5 | 4.71 | 2.56/6.62  | 0.334 | -0.55/0.85 | 4.08 |
| 121 | 5b2j | 142               | 487.1 | 666 | 40.1 | 25.5 | 75.5 | 4.83 | 2.37/7.13  | 0.343 | -0.48/0.91 | 4.16 |
| 122 | 5b31 | 146               | 483.0 | 667 | 39.8 | 25.6 | 77.9 | 4.68 | 1.55/6.68  | 0.333 | -0.57/1.12 | 3.33 |
| 123 | 5b32 | 146               | 483.5 | 668 | 39.6 | 25.3 | 77.8 | 4.69 | 2.06/7.29  | 0.329 | -0.46/1.00 | 3.35 |
| 124 | 5b33 | 146               | 486.4 | 667 | 39.9 | 25.5 | 77.9 | 4.68 | 1.24/7.12  | 0.332 | -0.66/1.00 | 3.17 |
| 125 | 5b40 | 146               | 490.3 | 670 | 40.1 | 25.5 | 78.0 | 4.68 | 2.86/7.14  | 0.331 | -0.44/0.86 | 3.52 |
| 126 | 5cp6 | 145               | 485.9 | 666 | 39.9 | 25.2 | 76.8 | 4.75 | 2.59/7.39  | 0.333 | -0.70/1.15 | 3.64 |
| 127 | 5CPI | 146               | 485.3 | 668 | 39.9 | 25.6 | 78.0 | 4.67 | 1.86/7.74  | 0.333 | -0.74/1.16 | 3.44 |
| 128 | 5CPJ | 146               | 491.7 | 667 | 40.1 | 25.4 | 78.0 | 4.68 | 0.94/6.67  | 0.330 | -0.68/1.04 | 3.42 |
| 129 | 5CPK | 145               | 488.0 | 666 | 40.2 | 26.0 | 77.8 | 4.69 | 2.57/7.35  | 0.339 | -0.60/1.09 | 3.42 |
| 130 | 5dnn | 145               | 486.1 | 665 | 40.0 | 25.3 | 76.8 | 4.75 | 2.67/7.31  | 0.334 | -0.53/1.20 | 3.80 |
| 131 | 5dnn | 145               | 485.6 | 665 | 39.9 | 25.4 | 76.8 | 4.75 | 2.69/7.25  | 0.334 | -0.54/1.18 | 3.79 |
| 132 | 5e5a | 146               | 483.3 | 666 | 39.7 | 25.4 | 78.2 | 4.66 | 2.85/6.48  | 0.329 | -0.46/1.22 | 3.91 |
| 133 | 5f99 | 147               | 489.0 | 667 | 39.9 | 25.5 | 78.6 | 4.64 | 2.25/6.65  | 0.329 | -0.51/1.09 | 3.76 |
| 134 | 5gse | Unusual structure |       |     |      |      |      |      |            |       |            |      |

|     |      |                |       |     |      |      |      |      |           |       |            |      |
|-----|------|----------------|-------|-----|------|------|------|------|-----------|-------|------------|------|
| 135 | 5gsu | 146            | 485.1 | 667 | 40.0 | 25.6 | 77.9 | 4.68 | 2.23/6.86 | 0.332 | -0.31/1.10 | 3.23 |
| 136 | 5gt0 | 146            | 484.4 | 668 | 39.7 | 25.9 | 77.8 | 4.68 | 2.37/6.80 | 0.336 | -0.40/1.09 | 3.46 |
| 137 | 5gt3 | 146            | 487.7 | 666 | 40.2 | 25.6 | 78.0 | 4.68 | 1.27/6.62 | 0.332 | -0.38/1.13 | 3.37 |
| 138 | 5gtc | 146            | 484.8 | 667 | 39.9 | 25.5 | 77.9 | 4.68 | 2.13/7.08 | 0.332 | -0.42/1.05 | 3.40 |
| 139 | 5gxq | 146            | 490.9 | 667 | 39.9 | 25.5 | 78.0 | 4.68 | 0.29/8.13 | 0.331 | -2.12/1.96 | 3.40 |
| 140 | 5hq2 | Incomplete NCP |       |     |      |      |      |      |           |       |            |      |
| 141 | 5jrg | 143            | 480.3 | 663 | 39.7 | 25.6 | 76.5 | 4.77 | 2.50/8.57 | 0.339 | -0.42/1.19 | 3.23 |
| 142 | 5kgf | 145            | 484.3 | 664 | 39.9 | 25.5 | 77.9 | 4.68 | 2.49/6.97 | 0.331 | -0.37/0.94 | 3.38 |
| 143 | 5mlu | 145            | 482.1 | 664 | 39.8 | 25.1 | 77.9 | 4.68 | 2.69/6.63 | 0.326 | -0.46/0.92 | 3.53 |
| 144 | 5nl0 | 193            | 647.4 | 725 | 39.8 | 25.6 | 78.0 | 4.67 | 0.56/6.82 | 0.333 | -0.79/0.82 | 3.44 |
| 145 | 5x0x | 146            | 492.2 | 666 | 40.3 | 27.3 | 78.1 | 4.67 | 2.38/7.59 | 0.354 | -1.09/1.19 | 3.49 |
| 146 | 5x0y | 146            | 491.7 | 669 | 40.2 | 27.5 | 78.2 | 4.67 | 2.59/6.45 | 0.356 | -0.64/1.55 | 3.23 |
| 147 | 5x7x | 145            | 483.4 | 668 | 39.6 | 26.1 | 77.8 | 4.69 | 2.54/6.41 | 0.340 | -0.75/0.99 | 3.69 |

**Table S4.** Parameters of the NCP-NCP contact in the published crystal structures.

Values that are outside typical range of NCP-NCP stacking are highlighted in bold; lower values are in plain bold, higher ones are in italic bold.

| No | PDB code | Distance, Å  | Axis-axis direction, degrees | NCP-NCP tilt, degrees | Tilt direction, degrees | Shift, Å     | Shift angle, degrees | Rise, Å | Reference |
|----|----------|--------------|------------------------------|-----------------------|-------------------------|--------------|----------------------|---------|-----------|
| 1  | 1AOI     | 67.78        | 179.7                        | 13.1                  | 11.2                    | 41.07        | -97.3                | -53.92  | (29)      |
| 2  | 1EQZ     | <b>72.03</b> | 179.2                        | <b>20.1</b>           | 13.0                    | 47.44        | -66.7                | 54.21   | (30)      |
| 3  | 1F66     | 67.86        | 179.8                        | 14.2                  | 5.8                     | 38.84        | -87.3                | 55.64   | (31)      |
| 4  | 1ID3     | <b>57.05</b> | -180.0                       | 11.2                  | 177.8                   | <b>14.12</b> | 80.0                 | -55.28  | (32)      |
| 5  | 1KX3     | 67.39        | 179.6                        | 13.0                  | 15.2                    | 41.12        | -97.0                | -53.38  | (11)      |
| 6  | 1KX4     | 66.42        | -179.1                       | 14.2                  | 139.6                   | 42.03        | 95.3                 | 51.43   |           |
| 7  | 1KX5     | 67.42        | 179.7                        | 12.7                  | 12.4                    | 40.93        | -96.8                | -53.58  | (33)      |
| 8  | 1M18     | 68.08        | 179.8                        | 13.9                  | 5.7                     | 39.25        | -89.2                | 55.63   |           |
| 9  | 1M19     | 68.04        | 179.8                        | 11.9                  | 7.1                     | 42.18        | -106.1               | -53.39  | (34)      |
| 10 | 1M1A     | 67.82        | 179.9                        | <b>5.8</b>            | 32.1                    | 38.27        | -100.8               | 55.99   |           |
| 11 | 1P34     | 68.11        | 179.8                        | 15.5                  | 5.5                     | 42.58        | -108.5               | -53.16  | (34)      |
| 12 | 1P3A     | 67.89        | 179.7                        | 16.0                  | 8.6                     | 42.79        | -107.9               | -52.71  |           |
| 13 | 1P3B     | 67.84        | 179.8                        | 14.7                  | 5.6                     | 38.92        | -88.4                | 55.57   |           |
| 14 | 1P3F     | 67.85        | 179.8                        | 15.3                  | 5.0                     | 39.01        | -88.0                | 55.51   |           |
| 15 | 1P3G     | 68.13        | 179.7                        | 15.4                  | 9.0                     | 38.65        | -87.7                | 56.11   |           |
| 16 | 1P3I     | 68.10        | 179.8                        | 14.6                  | 4.6                     | 39.31        | -88.7                | 55.61   |           |
| 17 | 1P3K     | 67.79        | 179.8                        | 15.2                  | 5.6                     | 42.15        | -107.8               | -53.09  |           |
| 18 | 1P3L     | 67.90        | 179.7                        | 14.7                  | 7.7                     | 42.53        | -107.4               | -52.93  |           |
| 19 | 1P3M     | 67.83        | 179.7                        | 15.1                  | 7.5                     | 42.49        | -107.9               | -52.88  |           |
| 20 | 1P3O     | 68.01        | 179.6                        | 15.9                  | 10.1                    | 43.08        | -107.8               | -52.63  |           |
| 21 | 1P3P     | 67.86        | 179.8                        | 15.2                  | 6.4                     | 42.45        | -107.9               | -52.95  | (35)      |
| 22 | 1S32     | 67.62        | 179.8                        | 15.1                  | 5.7                     | 41.93        | -108.6               | -53.05  |           |
| 23 | 1U35     | 68.17        | 179.9                        | <b>5.4</b>            | 59.8                    | 42.97        | -103.1               | -52.92  | (36)      |
| 24 | 1ZBB     | <b>58.36</b> | <b>-25.4</b>                 | <b>6.1</b>            | -14.8                   | <b>18.68</b> | 68.1                 | 55.29   | (25)      |
| 25 | 1ZLA     | 67.99        | 179.9                        | 15.1                  | 1.6                     | 42.14        | -108.5               | -52.92  | (37)      |
| 26 | 2CV5     | 66.74        | 179.6                        | 10.2                  | -29.1                   | 36.72        | -95.3                | -53.36  | (38)      |
| 27 | 2F8N     | 67.99        | 179.9                        | <b>4.1</b>            | 58.3                    | 42.31        | -104.2               | -53.23  | No ref    |
| 28 | 2FJ7     | 67.23        | -179.7                       | <b>9.3</b>            | 156.1                   | 40.90        | 95.0                 | 53.37   | (39)      |
| 29 | 2NQB     | 67.46        | 179.8                        | 14.5                  | 6.9                     | 39.49        | -77.0                | 54.70   | No ref    |
| 30 | 2NZD     | 67.44        | 179.7                        | 13.5                  | 9.1                     | 38.82        | -78.9                | 55.15   | (40)      |
| 31 | 2PYO     | 67.45        | 179.5                        | 13.4                  | 18.1                    | 41.78        | -97.7                | -52.95  | (41)      |
| 32 | 3A6N     | 67.42        | 179.6                        | 14.6                  | 13.8                    | 38.62        | -76.8                | 55.26   | (42)      |
| 33 | 3AFA     | 67.39        | 179.5                        | 14.8                  | 15.0                    | 38.46        | -76.4                | 55.34   |           |
| 34 | 3AN2     | 65.84        | <b>0.0</b>                   | <b>0.0</b>            | -175.0                  | 36.22        | 91.1                 | 53.11   | (43)      |
| 35 | 3AV1     | 67.55        | 179.6                        | 14.4                  | 14.1                    | 38.73        | -77.1                | 55.35   | (44)      |
| 36 | 3AV2     | 67.47        | 179.6                        | 14.6                  | 13.7                    | 38.62        | -76.7                | 55.32   |           |



|    |      |               |             |             |       |              |        |         |      |
|----|------|---------------|-------------|-------------|-------|--------------|--------|---------|------|
| 37 | 3AYW | 67.40         | 179.6       | 15.0        | 13.0  | 38.73        | -76.4  | 55.16   | (45) |
| 38 | 3AZE | 67.32         | 179.9       | <b>9.7</b>  | 9.9   | 38.94        | -80.9  | 54.91   |      |
| 39 | 3AZF | 67.62         | 179.6       | 14.5        | 13.3  | 38.80        | -77.2  | 55.37   |      |
| 40 | 3AZG | 67.65         | 179.5       | 14.9        | 14.3  | 38.76        | -76.7  | 55.44   |      |
| 41 | 3AZH | 67.57         | 179.5       | 14.7        | 16.5  | 38.43        | -76.8  | 55.57   |      |
| 42 | 3AZI | 67.42         | 179.9       | <b>9.7</b>  | 8.6   | 39.13        | -81.0  | 54.90   |      |
| 43 | 3AZJ | 67.43         | 179.4       | 15.1        | 17.1  | 38.29        | -76.4  | 55.50   |      |
| 44 | 3AZK | 67.50         | 179.5       | 14.2        | 15.6  | 38.59        | -77.2  | 55.39   |      |
| 45 | 3AZL | 67.59         | 179.5       | 14.8        | 14.5  | 38.73        | -76.8  | 55.39   |      |
| 46 | 3AZM | 67.03         | 179.9       | <b>9.3</b>  | 8.2   | 38.96        | -81.5  | 54.54   |      |
| 47 | 3AZN | 67.60         | 179.5       | 14.9        | 15.3  | 38.62        | -76.7  | 55.49   |      |
| 48 | 3B6F | 67.08         | 179.5       | 12.5        | 23.58 | 36.98        | -79.9  | 55.96   | (46) |
| 49 | 3B6G | 67.28         | 179.5       | 12.6        | 23.3  | 37.15        | -79.8  | 56.10   |      |
| 50 | 3C1B | 67.56         | 179.6       | 15.9        | 10.0  | 39.17        | -75.8  | 55.05   | (47) |
| 51 | 3C1C | 67.86         | 179.8       | 14.8        | 4.4   | 40.12        | -77.0  | 54.72   |      |
| 52 | 3KUY | 67.41         | 179.9       | 11.9        | 6.5   | 39.19        | -80.1  | 54.85   | (48) |
| 53 | 3KWQ | 67.34         | 179.8       | 13.1        | 6.0   | 39.39        | -77.3  | 54.61   | (49) |
| 54 | 3KXB | 67.13         | 179.9       | 13.1        | 5.4   | 39.16        | -77.1  | 54.53   |      |
| 55 | 3LEL | <b>55.80</b>  | -178.8      | <b>8.0</b>  | 7.3   | <b>19.47</b> | -56.3  | 52.29   | (50) |
| 56 | 3LJA | 67.64         | 179.7       | 12.3        | 11.9  | 38.89        | -80.0  | 55.34   | (51) |
| 57 | 3LZ0 | 67.40         | -179.8      | <b>7.7</b>  | 155.1 | 37.83        | 83.9   | -55.78  | (52) |
| 58 | 3LZ1 | 67.39         | -179.8      | <b>7.7</b>  | 156.1 | 37.89        | 83.8   | -55.73  |      |
| 59 | 3MGP | 67.71         | 179.2       | 17.3        | 17.9  | 38.53        | -72.8  | 55.68   | (53) |
| 60 | 3MGQ | 67.56         | 179.3       | 16.5        | 18.2  | 38.44        | -73.4  | 55.55   |      |
| 61 | 3MGR | 67.57         | 179.7       | 12.2        | 12.5  | 38.77        | -80.2  | 55.35   |      |
| 62 | 3MGS | 67.58         | 179.7       | 12.1        | 12.1  | 38.83        | -80.3  | 55.31   |      |
| 63 | 3MNN | 67.57         | 179.9       | 11.9        | 4.2   | 39.48        | -80.3  | 54.83   | (54) |
| 64 | 3MVD | <b>100.27</b> | 160.4       | <b>23.2</b> | 79.8  | <b>93.01</b> | -123.5 | -35.41  | (55) |
|    |      | <b>102.68</b> | 0.0         | <b>0.0</b>  | 92.6  | <b>21.12</b> | 92.5   | -100.49 |      |
| 65 | 3O62 | 67.33         | 179.8       | 10.3        | 11.0  | 38.76        | -79.9  | 55.06   | (56) |
| 66 | 3REH | 67.53         | 179.7       | 13.5        | 10.6  | 38.66        | -78.9  | 55.37   | (57) |
| 67 | 3REI | 67.52         | 179.7       | 13.1        | 11.8  | 38.61        | -79.2  | 55.39   |      |
| 68 | 3REJ | 66.48         | -179.2      | 13.5        | 144.7 | 33.29        | 82.5   | -57.54  |      |
| 69 | 3REK | 66.41         | -179.3      | 12.9        | 145.3 | 33.30        | 82.6   | -57.46  |      |
| 70 | 3REL | 66.55         | -179.2      | 13.5        | 143.6 | 33.09        | 82.3   | -57.73  |      |
| 71 | 3TU4 | <b>95.84</b>  | <b>58.2</b> | 14.9        | 61.8  | <b>1.79</b>  | -157.8 | 95.83   | (58) |
| 72 | 3UT9 | 67.43         | 179.9       | <b>8.0</b>  | 15.7  | 38.53        | -83.8  | 55.34   | (59) |
| 73 | 3UTA | 67.66         | 179.7       | 12.6        | 11.9  | 38.77        | -80.3  | 55.45   |      |
| 74 | 3UTB | 66.35         | -179.2      | 13.1        | 134.2 | 33.33        | 82.6   | -57.37  |      |
| 75 | 3W96 | 67.38         | 179.9       | 9.2         | 10.4  | 39.06        | -80.9  | 54.90   | (60) |
| 76 | 3W97 | 67.89         | 179.9       | <b>9.4</b>  | 9.2   | 39.73        | -80.9  | 55.05   |      |
| 77 | 3W98 | 67.42         | 179.9       | <b>9.8</b>  | 9.2   | 39.20        | -80.5  | 54.86   |      |
| 78 | 3W99 | 67.36         | 179.8       | 10.2        | 14.6  | 38.70        | -79.8  | 55.13   |      |
| 79 | 3WA9 | 67.06         | 179.4       | 14.8        | 18.1  | 37.73        | -75.2  | 55.44   | (61) |
| 80 | 3WAA | 67.35         | 179.4       | 14.8        | 17.6  | 37.97        | -75.2  | 55.62   |      |

|     |      |               |              |             |        |              |              |              |      |
|-----|------|---------------|--------------|-------------|--------|--------------|--------------|--------------|------|
| 81  | 3WKJ | 67.75         | 179.5        | 13.3        | 19.9   | 38.11        | -79.0        | 56.02        | (62) |
| 82  | 3wtp | 66.26         | -179.7       | 10.6        | -20.9  | 40.77        | -81.8        | 52.23        | (63) |
| 83  | 3x1s | 67.37         | 179.8        | 10.5        | 14.2   | 38.66        | -80.1        | 55.18        | (64) |
| 84  | 3x1t | 67.39         | 179.5        | 14.4        | 14.6   | 38.54        | -76.0        | 55.29        |      |
| 85  | 3x1u | 67.22         | 179.9        | 9.8         | 10.2   | 38.90        | -80.2        | 54.82        |      |
| 86  | 3x1v | 67.04         | 179.5        | 12.8        | 20.7   | 37.88        | -79.2        | 55.31        |      |
| 87  | 4J8U | 67.61         | 179.7        | 12.6        | 12.2   | 38.72        | -79.5        | 55.43        | (65) |
| 88  | 4J8V | 67.62         | 179.6        | 12.9        | 14.2   | 38.58        | -79.4        | 55.54        |      |
| 89  | 4J8W | 67.58         | 179.7        | 12.8        | 13.0   | 38.71        | -79.5        | 55.40        |      |
| 90  | 4J8X | 67.56         | 179.7        | 12.8        | 14.5   | 38.46        | -79.5        | 55.55        |      |
| 91  | 4JJN | <b>95.86</b>  | <b>58.4</b>  | 13.7        | 64.0   | <b>2.06</b>  | -117.8       | 95.82        | (66) |
| 92  | 4KGC | 67.58         | 179.5        | 12.9        | 21.9   | 37.75        | -79.5        | 56.05        | (67) |
| 93  | 4KUD | <b>93.72</b>  | <b>-57.7</b> | <b>23.6</b> | 153.1  | <b>20.16</b> | 3.3          | -91.52       | (68) |
| 94  | 4LD9 | <b>93.22</b>  | <b>-57.3</b> | <b>27.0</b> | 163.2  | <b>22.49</b> | 2.8          | -90.47       | (69) |
| 95  | 4QLC | 97.56         | 121.6        | 78.9        | -142.5 | 97.36        | 9.4          | -6.35        | (70) |
|     |      | 77.23         | 166.9        | 85.5        | -102.2 | 10.94        | -60.8        | -76.46       |      |
| 96  | 4R8P | <b>101.17</b> | <b>74.9</b>  | 2.9         | -142.6 | 30.19        | 132.1        | -96.56       | (71) |
| 97  | 4wu8 | 67.43         | 179.8        | 11.8        | 9.1    | 38.93        | -80.1        | 55.05        | (72) |
| 98  | 4wu9 | 67.17         | 179.9        | 9.8         | 5.8    | 38.95        | -81.8        | 54.72        |      |
| 99  | 4x23 | <b>54.16</b>  | 173.1        | <b>0.5</b>  | 109.0  | <b>16.39</b> | -4.6         | 51.62        | (73) |
|     |      | <b>59.29</b>  | <b>-7.8</b>  | 15.9        | 17.2   | <b>20.16</b> | -67.6        | -55.76       |      |
| 100 | 4xuj | 67.56         | 179.7        | 12.5        | 13.6   | 38.62        | -79.5        | 55.43        | (74) |
| 101 | 4xzq | 67.34         | 179.7        | 12.3        | 13.6   | 40.78        | -96.5        | -53.59       | (75) |
| 102 | 4ym5 | 67.10         | 179.4        | 12.1        | 32.5   | 36.35        | -79.2        | 56.40        | (76) |
| 103 | 4ym6 | 66.95         | 179.1        | 7.3         | 125.8  | 35.68        | -92.6        | 56.65        |      |
| 104 | 4ys3 | 67.40         | 179.7        | 12.3        | 12.7   | 40.72        | -96.2        | -53.70       | (75) |
| 105 | 4Z5T | 67.17         | -180.0       | <b>4.8</b>  | 177.1  | 39.07        | 87.8         | -54.63       | (77) |
| 106 | 4z66 | 67.42         | 179.7        | 12.7        | 12.8   | 40.86        | -96.8        | -53.63       | (75) |
| 107 | 4zux | <b>95.46</b>  | 180.0        | 23.9        | -90.1  | 37.48        | -26.9        | 87.80        | (78) |
|     |      | <b>98.21</b>  | <b>-92.3</b> | 80.2        | 171.2  | 91.86        | -106.5       | 34.74        |      |
| 108 | 5AV5 | 67.69         | 179.6        | 12.8        | 15.5   | 38.42        | -79.4        | 55.73        | (79) |
| 109 | 5AV6 | 67.71         | 179.8        | 11.8        | 11.7   | 38.84        | -80.3        | 55.46        |      |
| 110 | 5AV8 | 67.63         | 179.7        | 11.9        | 12.4   | 38.70        | -80.2        | 55.46        |      |
| 111 | 5AV9 | 67.60         | 179.7        | 11.9        | 12.0   | 38.77        | -80.2        | 55.37        |      |
| 112 | 5AVB | 67.66         | 179.6        | 13.0        | 15.7   | 38.31        | -79.2        | 55.77        |      |
| 113 | 5AVC | 67.78         | 179.6        | 12.8        | 14.8   | 38.58        | -79.5        | 55.73        |      |
| 114 | 5ay8 | <b>54.18</b>  | 180.0        | 13.5        | 0.4    | <b>21.64</b> | <b>-49.6</b> | <b>49.67</b> | (80) |
| 115 | 5b0y | 67.00         | -179.9       | <b>9.2</b>  | -11.8  | 40.38        | -82.0        | 53.46        | (81) |
| 116 | 5b0z | 66.84         | 179.2        | 13.9        | 30.6   | 36.49        | -79.0        | 56.00        |      |
| 117 | 5b1l | 66.74         | -179.9       | 9.03        | -10.7  | 40.68        | -83.1        | 52.91        | (82) |
| 118 | 5b1m | 66.85         | 179.2        | 14.0        | 30.1   | 36.90        | -79.2        | 55.74        |      |
| 119 | 5b24 | 67.07         | 179.7        | 8.8         | 25.7   | 37.59        | -83.7        | 55.55        | (83) |
| 120 | 5b2i | 67.38         | 179.8        | 8.7         | 15.2   | 38.72        | -83.7        | 55.14        | (84) |
| 121 | 5b2j | 67.48         | 179.9        | 11.2        | 4.1    | 39.40        | -81.3        | 54.79        |      |
| 122 | 5b31 | 67.31         | 179.5        | 14.7        | 16.7   | 38.10        | -75.6        | 55.49        | (85) |

|     |      |                             |              |             |       |              |        |        |       |
|-----|------|-----------------------------|--------------|-------------|-------|--------------|--------|--------|-------|
| 123 | 5b32 | 66.17                       | -179.9       | 10.1        | -5.3  | 40.60        | -81.2  | 52.25  |       |
| 124 | 5b33 | 67.21                       | 179.4        | 15.4        | 17.0  | 37.80        | -74.5  | 55.57  |       |
| 125 | 5b40 | <b>62.07</b>                | <b>120.4</b> | <b>19.3</b> | 56.0  | <b>11.14</b> | -106.5 | -61.06 | (86)  |
| 126 | 5cp6 | 67.29                       | 179.7        | 11.6        | 14.3  | 38.26        | -80.0  | 55.35  | (87)  |
| 127 | 5CPI | 67.30                       | 179.6        | 12.2        | 18.2  | 38.13        | -78.6  | 55.46  |       |
| 128 | 5CPJ | 66.80                       | 179.4        | 13.2        | 27.7  | 36.41<br>9   | -78.1  | 56.00  | (88)  |
| 129 | 5CPK | 66.82                       | 179.5        | 10.9        | 35.6  | 41.55        | -94.7  | -52.33 |       |
| 130 | 5dnm | 67.59                       | 179.6        | 12.5        | 17.3  | 38.21        | -79.8  | 55.75  | (89)  |
| 131 | 5dnn | 67.65                       | 179.6        | 12.6        | 18.5  | 38.10        | -79.7  | 55.91  | (90)  |
| 132 | 5e5a | 67.53                       | 179.9        | 13.2        | 3.9   | 39.93        | -78.2  | 54.46  | (90)  |
| 133 | 5f99 | 67.73                       | 179.9        | <b>7.6</b>  | 13.7  | 39.57        | -83.3  | 54.97  | (91)  |
| 134 | 5gse | Unusual structure           |              |             |       |              |        |        | (92)  |
| 135 | 5gsu | 67.69                       | 179.3        | 15.7        | 19.2  | 38.40        | -74.7  | 55.74  |       |
| 136 | 5gt0 | 67.08                       | -179.9       | 9.5         | -7.8  | 38.60        | -94.3  | -54.87 | (93)  |
| 137 | 5gt3 | 67.85                       | 179.3        | 15.3        | 20.1  | 38.29        | -75.3  | 56.01  |       |
| 138 | 5gtc | 67.32                       | 179.9        | 9.3         | 5.7   | 39.49        | -81.3  | 54.52  | (94)  |
| 139 | 5gxq | 67.53                       | 179.4        | 15.1        | 18.4  | 38.13        | -75.8  | 55.73  | (95)  |
| 140 | 5hq2 | No stacking. Incomplete NCP |              |             |       |              |        |        | (96)  |
| 141 | 5jrg | 66.62                       | -179.9       | 4.2         | 155.8 | 37.60        | -89.8  | 55.00  | (97)  |
| 142 | 5kgf | Cryo-EM. Single molecule    |              |             |       |              |        |        | (98)  |
| 143 | 5mlu | 67.24                       | -179.7       | 8.7         | 141.5 | 36.63        | 84.2   | -56.39 | (99)  |
| 144 | 5nl0 | <b>61.73</b>                | <b>0.0</b>   | <b>0.0</b>  | -69.0 | 21.55        | 92.7   | 57.84  | (100) |
| 145 | 5x0x | Cryo-EM. Single molecule    |              |             |       |              |        |        | (101) |
| 146 | 5x0y | Cryo-EM. Single molecule    |              |             |       |              |        |        |       |
| 147 | 5x7x | 66.39                       | -179.8       | 8.4         | -19.6 | 40.54        | -83.1  | 52.57  | (95)  |

**Table S5.** Summary of availability, location and participation of the histone tails in NCP-NCP stacking from the literature data reporting NCP structures. This table take into account H4 and H2A considering that these full-length tails contain respectively 23 and 20 amino acids.

| No | PDB code | NCP1             |                  |                  |                  | NCP2             |             |                  |                    |
|----|----------|------------------|------------------|------------------|------------------|------------------|-------------|------------------|--------------------|
|    |          | H2A              |                  | H4               |                  | H2A              |             | H4               |                    |
|    |          | a.a. (chain)     | Contacts         | a.a. (chain)     | Contacts         | a.a. (chain)     | Contacts    | a.a. (chain)     | Contacts           |
| 1  | 1AOI     | <b>4-20 (C)</b>  | <b>DNA1+DNA2</b> | <b>20-23 (B)</b> | <b>DNA1</b>      | <b>12-20 (G)</b> | <b>DNA2</b> | <b>16-23 (B)</b> | <b>AcIsl1</b>      |
| 2  | 1EQZ     | 2-20 (E)         | DNA1             | 8-23 (H)         | AcIsl2+DNA1      | 1-20 (A)         | DNA1+DNA2   | 14-23 (D)        | DNA2               |
| 3  | 1F66     | 16-20 (G)        | DNA1             | 17-23 (F)        | AcIsl2+DNA1      | 16-20 (C)        | DNA2        | 23 (B)           | DNA2               |
| 4  | 1ID3     | 16-20 (C)        | DNA1             | absent           | --               | 13-18 (G)        | DNA2        | 18-23 (F)        | DNA2?              |
| 5  | 1KX3     | 14-20 (C)        | DNA1+DNA2        | 21-23 (B)        | DNA1             | 14-20 (G)        | DNA2        | <b>16-23 (F)</b> | AcIsl1             |
| 6  | 1KX4     | 14-20 (G)        | DNA1             | absent           | --               | 16-20 (C)        | DNA2        | 20-23 (B)        | AcIsl1             |
| 7  | 1KX5     | <b>15-20 (C)</b> | <b>DNA1</b>      | <b>15-23 (B)</b> | <b>DNA1</b>      | <b>13-20 (G)</b> | <b>DNA2</b> | <b>16-23 (F)</b> | <b>AcIsl1+DNA2</b> |
| 8  | 1M18     | 14-20 (G)        | DNA1             | 20-23 (F)        | AcIsl2           | 14-20 (C)        | DNA2        | absent           | --                 |
| 9  | 1M19     | 14-20 (C)        | DNA1+DNA2        | absent           | --               | 15-20 (G)        | DNA2        | 17-23 (F)        | AcIsl1+DNA2        |
| 10 | 1M1A     | 14-20 (G)        | DNA1             | 10-23 (F)        | AcIsl2           | 14-20 (C)        | DNA2        | 23 (B)           | DNA2               |
| 11 | 1P34     | 12-20 (C)        | DNA1+DNA2        | 20-23 (B)        | DNA1             | 13-20 (G)        | DNA2        | 22-23 (F)        | DNA2               |
| 12 | 1P3A     | 14-20 (C)        | DNA1+DNA2        | absent           | --               | 16-20 (G)        | DNA2        | 21-23 (F)        | AcIsl1             |
| 13 | 1P3B     | 15-20 (G)        | DNA1             | 22-23 (F)        | AcIsl2           | 13-20 (G)        | DNA2        | absent           | --                 |
| 14 | 1P3F     | 13-20 (G)        | DNA1             | 21-23 (F)        | AcIsl1           | 15-20 (C)        | DNA1+DNA2   | 23 (B)           | DNA2               |
| 15 | 1P3G     | 13-20 (G)        | DNA1             | <b>16-23 (F)</b> | AcIsl2+DNA1      | 14-20 (C)        | DNA1+DNA2   | absent           | --                 |
| 16 | 1P3I     | 16-20 (G)        | DNA1             | absent           | --               | 15-20 (C)        | DNA2        | absent           | --                 |
| 17 | 1P3K     | 15-20 (C)        | DNA1+DNA2        | absent           | --               | 14-20 (G)        | DNA2        | 22-23 (F)        | AcIsl1             |
| 18 | 1P3L     | 15-20 (C)        | DNA1+DNA2        | absent           | --               | 11-20 (G)        | DNA2        | 20-23 (F)        | AcIsl1             |
| 19 | 1P3M     | 14-20 (C)        | DNA1+DNA2        | absent           | --               | 15-20 (G)        | DNA2        | 21-23 (F)        | AcIsl1             |
| 20 | 1P3O     | 14-20 (C)        | DNA1+DNA2        | 21-23 (B)        | DNA1             | 14-20 (G)        | DNA2        | absent           | --                 |
| 21 | 1P3P     | 14-20 (C)        | DNA1+DNA2        | 22-23 (B)        | DNA1             | 12-20 (G)        | DNA2        | 21-23 (F)        | AcIsl1             |
| 22 | 1S32     | 12-20 (C)        | DNA1+DNA2        | 22-23 (B)        | DNA1             | 13-20 (G)        | DNA2        | <b>15-23 (F)</b> | AcIsl1+DNA2        |
| 23 | 1U35     | 14-20 (C)        | DNA1             | absent           | --               | 14-20 (G)        | DNA2        | 20-23 (F)        | AcIsl1+DNA2        |
| 24 | 1ZBB     | <b>13-20 (G)</b> | <b>DNA1</b>      | <b>16-23 (F)</b> | <b>DNA1+DNA2</b> | <b>13-20 (g)</b> | <b>DNA2</b> | <b>16-23 (f)</b> | <b>DNA1+DNA2</b>   |
| 25 | 1ZLA     | 14-20 (C)        | DNA1             | absent           | --               | 14-20 (G)        | DNA2        | 19-23 (F)        | AcIsl1+DNA2        |

|           |             |                  |             |                  |                    |                  |             |               |             |
|-----------|-------------|------------------|-------------|------------------|--------------------|------------------|-------------|---------------|-------------|
| 26        | 2CV5        | 11-20 (C)        | DNA1        | absent           | --                 | 15-20 (G)        | DNA2        | 18-23 (F)     | AcIsl1+DNA2 |
| 27        | 2F8N        | absent           | --          | absent           | --                 | absent           | --          | 19-23 (F)     | AcIsl1      |
| 28        | 2FJ7        | 14-20 (C)        | DNA1        | absent           | --                 | 14-20 (G)        | DNA2        | 19-23 (F)     | AcIsl1      |
| 29        | 2NQB        | 14-20 (G)        | DNA1        | 17-23 (F)        | AcIsl1             | 14-20 (C)        | DNA1+DNA2   | 22-23 (B)     | DNA2        |
| 30        | 2NZD        | 14-20 (G)        | DNA1        | <b>16-23 (F)</b> | AcIsl1             | 14-20 (C)        | DNA1+DNA2   | 21-23 (B)     | DNA2        |
| 31        | 2PYO        | 13-20 (C)        | DNA1+DNA2   | absent           | --                 | 11-20 (G)        | DNA2        | 15-23 (F)     | AcIsl1+DNA2 |
| 32        | 3A6N        | 15-20 (G)        | DNA1        | 19-23 (F)        | AcIsl1             | 14-20 (C)        | DNA2        | 22-23 (B)     | DNA2        |
| 33        | 3AFA        | 15-20 (G)        | DNA1        | 19-23 (F)        | AcIsl1             | 11-20 (C)        | DNA1+DNA2   | absent        | --          |
| 34        | 3AN2        | 16-20 (G)        | DNA1        | absent           | --                 | 17-21 (C)        | DNA2        | absent        | --          |
| 35        | 3AV1        | 15-20 (G)        | DNA1        | 19-23 (F)        | AcIsl2+DNA1        | 14-20 (C)        | DNA1+DNA2   | absent        | --          |
| 36        | 3AV2        | 15-20 (G)        | DNA1        | 19-23 (F)        | AcIsl2+DNA1        | 14-20 (C)        | DNA1+DNA2   | absent        | --          |
| 37        | 3AYW        | 16-20 (G)        | DNA1        | 19-23 (F)        | AcIsl2+DNA1        | 11-20 (C)        | DNA1+DNA2   | absent        | --          |
| 38        | 3AZE        | 15-20 (G)        | DNA1        | 18-23 (F)        | AcIsl2+DNA1        | 11-20 (C)        | DNA2        | absent        | --          |
| 39        | 3AZF        | 15-20 (G)        | DNA1        | 19-23 (F)        | AcIsl2+DNA1        | 11-20 (C)        | DNA1+DNA2   | absent        | --          |
| 40        | 3AZG        | 15-20 (G)        | DNA1        | 19-23 (F)        | AcIsl2+DNA1        | 11-20 (C)        | DNA1+DNA2   | absent        | --          |
| 41        | 3AZH        | 15-20 (G)        | DNA1        | 18-23 (F)        | AcIsl2+DNA1        | 13-20 (C)        | DNA1+DNA2   | absent        | --          |
| 42        | 3AZI        | 15-20 (G)        | DNA1        | 19-23 (F)        | AcIsl2+DNA1        | 11-20 (C)        | DNA2        | absent        | --          |
| 43        | 3AZJ        | 15-20 (G)        | DNA1        | 19-23 (F)        | AcIsl2             | 11-20 (C)        | DNA2        | absent        | --          |
| 44        | 3AZK        | 14-20 (G)        | DNA1        | 19-23 (F)        | AcIsl2+DNA1        | 11-20 (C)        | DNA2        | absent        | --          |
| 45        | 3AZL        | 14-20 (G)        | DNA1        | 17-23 (F)        | AcIsl2+DNA1        | 11-20 (C)        | DNA1+DNA2   | absent        | --          |
| 46        | 3AZM        | 15-20 (G)        | DNA1        | 19-23 (F)        | AcIsl2+DNA1        | 13-20 (C)        | DNA2        | absent        | --          |
| 47        | 3AZN        | 15-20 (G)        | DNA1        | 19-23 (F)        | AcIsl2+DNA1        | 11-20 (C)        | DNA2        | absent        | --          |
| 48        | 3B6F        | 13-20 (G)        | DNA1        | <b>16-23 (F)</b> | AcIsl2+DNA1        | 15-20 (C)        | DNA2        | absent        | --          |
| 49        | 3B6G        | 13-20 (G)        | DNA1        | <b>16-23 (F)</b> | AcIsl2+DNA1        | 15-20 (C)        | DNA2        | absent        | --          |
| 50        | 3C1B        | 16-20 (G)        | DNA1        | <b>16-23 (F)</b> | AcIsl2+DNA1        | 14-20 (C)        | DNA2        | 23 (B)        | DNA2        |
| 51        | 3C1C        | 16-20 (G)        | DNA1        | 19-23 (F)        | AcIsl2             | 14-20 (C)        | DNA2        | absent        | --          |
| 52        | 3KUY        | 14-20 (G)        | DNA1        | <b>16-23 (F)</b> | AcIsl2             | 14-20 (C)        | DNA2        | 21-23 (B)     | DNA2        |
| 53        | 3KWQ        | 14-20 (G)        | DNA1        | 20-23 (F)        | AcIsl2             | 14-20 (C)        | DNA2        | absent        | --          |
| 54        | 3KXB        | 20 (G)           | DNA1        | <b>16-23 (F)</b> | AcIsl2             | 14-20 (C)        | DNA2        | absent        | --          |
| <b>55</b> | <b>3LEL</b> | <b>13-20 (G)</b> | <b>DNA1</b> | <b>17-23 (F)</b> | <b>AcIsl2+DNA1</b> | <b>15-20 (M)</b> | <b>DNA2</b> | <b>absent</b> | <b>--</b>   |
| 56        | 3LJA        | 13-20 (G)        | DNA1        | <b>16-23 (F)</b> | AcIsl2+DNA1        | 15-20 (C)        | DNA2        | absent        | --          |

|    |      |                            |      |                  |                       |           |           |           |           |
|----|------|----------------------------|------|------------------|-----------------------|-----------|-----------|-----------|-----------|
| 57 | 3LZ0 | 16-20 (C)                  | DNA1 | 20-23 (B)        | AcIsl2                | 14-20 (G) | DNA2      | absent    | --        |
| 58 | 3LZ1 | 16-20 (C)                  | DNA1 | 20-23 (B)        | AcIsl2                | 14-20 (G) | DNA2      | absent    | --        |
| 59 | 3MGP | 14-20 (G)                  | DNA1 | <b>16-23 (F)</b> | AcIsl2+DNA1           | 15-20 (C) | DNA2      | absent    | --        |
| 60 | 3MGQ | 13-20 (G)                  | DNA1 | <b>16-23 (F)</b> | AcIsl2+DNA1           | 15-20 (C) | DNA2      | absent    | --        |
| 61 | 3MGR | 13-20 (G)                  | DNA1 | <b>16-23 (F)</b> | AcIsl2+DNA1           | 15-20 (C) | DNA2      | absent    | --        |
| 62 | 3MGS | 13-20 (G)                  | DNA1 | <b>16-23 (F)</b> | AcIsl2+DNA1           | 15-20 (C) | DNA2      | absent    | --        |
| 63 | 3MNN | 14-20 (G)                  | DNA1 | <b>16-23 (F)</b> | AcIsl2                | 14-20 (C) | DNA2      | 21-23 (B) | DNA2      |
| 64 | 3MVD | NCP + protein. No stacking |      |                  |                       |           |           |           |           |
| 65 | 3O62 | 14-20 (G)                  | DNA1 | 18-23 (F)        | AcIsl2+DNA1           | 14-20 (C) | DNA2      | 23 (B)    | --        |
| 66 | 3REH | 14-20 (G)                  | DNA1 | <b>16-23 (F)</b> | AcIsl2                | 14-20 (C) | DNA1+DNA2 | 21-23 (B) | DNA2      |
| 67 | 3REI | 14-20 (G)                  | DNA1 | <b>16-23 (F)</b> | AcIsl2                | 14-20 (C) | DNA1+DNA2 | 21-23 (B) | DNA2      |
| 68 | 3REJ | 16-20 (C)                  | DNA1 | 20-23 (B)        | AcIsl2                | 14-20 (G) | DNA2      | absent    | --        |
| 69 | 3REK | 16-20 (C)                  | DNA1 | 20-23 (B)        | AcIsl2                | 14-20 (G) | DNA2      | absent    | --        |
| 70 | 3REL | 16-20 (C)                  | DNA1 | 20-23 (B)        | AcIsl2                | 14-20 (G) | DNA2      | absent    | --        |
| 71 | 3TU4 | NCP + protein. No stacking |      |                  |                       |           |           |           |           |
| 72 | 3UT9 | 16-20 (G)                  | DNA1 | <b>16-23 (F)</b> | AcIsl2                | 14-20 (C) | DNA2      | absent    | --        |
| 73 | 3UTA | 14-20 (G)                  | DNA1 | <b>16-23 (F)</b> | AcIsl2+DNA1           | 14-20 (C) | DNA2      | 21-23 (B) | DNA2      |
| 74 | 3UTB | 16-20 (C)                  | DNA1 | 20-23 (B)        | AcIsl2                | 14-20 (G) | DNA2      | absent    | --        |
| 75 | 3W96 | 16-20 (G)                  | DNA1 | 20-23 (F)        | AcIsl2                | 12-20 (C) | DNA2      | absent    | --        |
| 76 | 3W97 | 16-20 (G)                  | DNA1 | 19-23 (F)        | AcIsl2                | 13-20 (C) | DNA2      | absent    | --        |
| 77 | 3W98 | 15-20 (G)                  | DNA1 | 19-23 (F)        | AcIsl2                | 13-20 (C) | DNA2      | absent    | --        |
| 78 | 3W99 | 17-20 (G)                  | DNA1 | 19-23 (F)        | AcIsl2+DNA1           | 14-20 (C) | DNA2      | absent    | --        |
| 79 | 3WA9 | 17-20 (G)                  | DNA1 | 19-23 (F)        | AcIsl2+DNA1           | 15-20 (C) | DNA2      | absent    | --        |
| 80 | 3WAA | 17-20 (G)                  | DNA1 | 19-23 (F)        | AcIsl2+DNA1           | 14-20 (C) | DNA2      | absent    | --        |
| 81 | 3WKJ | 15-20 (G)                  | DNA1 | 19-23 (F)        | AcIsl2+DNA1           | 12-20 (C) | DNA2      | absent    | --        |
| 82 | 3wtp | 14-20 (G)                  | DNA1 | 18-23 (F)        | AcIsl2+DNA1           | 12-20 (C) | DNA2      | absent    | --        |
| 83 | 3x1s | 15-20 (G)                  | DNA1 | 19-23 (F)        | AcIsl2                | 14-20 (C) | DNA2      | absent    | --        |
| 84 | 3x1t | 14-20 (G)                  | DNA1 | <b>16-23 (F)</b> | <b>AcIsl2+DNA1</b>    | 14-20 (C) | DNA2      | 22-23 (B) | DNA2      |
| 85 | 3x1u | 11-20 (G)                  | DNA1 | <b>16-23 (F)</b> | <b>AcIsl2+DNA1</b>    | 14-20 (C) | DNA2      | 20-23 (B) | Other NCP |
| 86 | 3x1v | 11-20 (G)                  | DNA1 | <b>16-23 (F)</b> | <b>AcIsl2</b>         | 13-20 (C) | DNA2      | absent    | --        |
| 87 | 4J8U | 14-20 (G)                  | DNA1 | <b>16-23 (F)</b> | <b>AcIsl2+ AcIsl2</b> | 14-20 (C) | DNA2+DNA1 | 21-23 (B) | DNA2      |

|     |      |                            |      |                  |                       |           |            |           |      |
|-----|------|----------------------------|------|------------------|-----------------------|-----------|------------|-----------|------|
| 88  | 4J8V | 14-20 (G)                  | DNA1 | <b>16-23 (F)</b> | <b>AcIsl2+ AcIsl2</b> | 14-20 (C) | DNA2       | 21-23 (B) | DNA2 |
| 89  | 4J8W | 14-20 (G)                  | DNA1 | <b>16-23 (F)</b> | <b>AcIsl2</b>         | 14-20 (C) | DNA2       | 21-23 (B) | DNA2 |
| 90  | 4J8X | 14-20 (G)                  | DNA1 | <b>16-23 (F)</b> | <b>AcIsl2</b>         | 14-20 (C) | DNA2       | 21-23 (B) | DNA2 |
| 91  | 4JJN | NCP + protein. No stacking |      |                  |                       |           |            |           |      |
| 92  | 4KGC | 14-20 (G)                  | DNA1 | <b>16-23 (F)</b> | <b>AcIsl2</b>         | 14-20 (C) | DNA2       | 21-23 (B) | DNA2 |
| 93  | 4KUD | NCP + protein. No stacking |      |                  |                       |           |            |           |      |
| 94  | 4LD9 | NCP + protein. No stacking |      |                  |                       |           |            |           |      |
| 95  | 4QLC | NCP + protein. No stacking |      |                  |                       |           |            |           |      |
| 96  | 4R8P | NCP + protein. No stacking |      |                  |                       |           |            |           |      |
| 97  | 4wu8 | 14-20 (G)                  | DNA1 | <b>16-23 (F)</b> | <b>AcIsl2</b>         | 14-20 (C) | DNA2       | 21-23 (B) | DNA2 |
| 98  | 4wu9 | 14-20 (G)                  | DNA1 | <b>16-23 (F)</b> | <b>AcIsl2</b>         | 14-20 (C) | DNA2       | 21-23 (B) | DNA2 |
| 99  | 4x23 | 15-20 (G)                  | DNA1 | absent           | --                    | 15-20 (C) | DNA2       | absent    | --   |
| 100 | 4xuj | 14-20 (G)                  | DNA1 | <b>16-23 (F)</b> | AcIsl2+DNA1           | 14-20 (C) | DNA2+ DNA1 | 21-23 (B) | DNA2 |
| 101 | 4xzq | 14-20 (G)                  | DNA1 | absent           | --                    | 14-20 (C) | DNA2+ DNA1 | absent    | --   |
| 102 | 4ym5 | 16-20 (G)                  | DNA1 | <b>16-23 (F)</b> | <b>AcIsl2</b>         | 11-20 (C) | DNA2       | absent    | --   |
| 103 | 4ym6 | 15-20 (G)                  | DNA1 | 19-23 (F)        | AcIsl2+DNA1           | 11-20 (C) | DNA2       | absent    | --   |
| 104 | 4ys3 | 14-20 (G)                  | DNA1 | absent           | --                    | 14-20 (C) | DNA2       | absent    | --   |
| 105 | 4Z5T | 14-20 (C)                  | DNA1 | 20-23 (B)        | AcIsl2+DNA1           | 15-20 (G) | DNA2       | absent    | --   |
| 106 | 4zux | NCP + protein. No stacking |      |                  |                       |           |            |           |      |
| 107 | 4z66 | 14-20 (G)                  | DNA1 | 21-23 (F)        | AcIsl2                | 14-20 (C) | DNA2+ DNA1 | absent    | --   |
| 108 | 5AV5 | 14-20 (G)                  | DNA1 | 17-23 (F)        | AcIsl2+DNA1           | 11-20 (C) | DNA2+ DNA1 | 21-23 (B) | DNA2 |
| 109 | 5AV6 | 14-20 (G)                  | DNA1 | 17-23 (F)        | AcIsl2+DNA1           | 13-20 (C) | DNA2+ DNA1 | 21-23 (B) | DNA2 |
| 110 | 5AV8 | 14-20 (G)                  | DNA1 | 17-23 (F)        | AcIsl2+DNA1           | 13-20 (C) | DNA2       | 21-23 (B) | DNA2 |
| 111 | 5AV9 | 14-20 (G)                  | DNA1 | 17-23 (F)        | AcIsl2+DNA1           | 13-20 (C) | DNA2       | 21-23 (B) | DNA2 |
| 112 | 5AVB | 14-20 (G)                  | DNA1 | <b>16-23 (F)</b> | AcIsl2+DNA1           | 13-20 (C) | DNA2+ DNA1 | 21-23 (B) | DNA2 |
| 113 | 5AVC | 14-20 (G)                  | DNA1 | <b>16-23 (F)</b> | AcIsl2+DNA1           | 13-20 (C) | DNA2+ DNA1 | 21-23 (B) | DNA2 |
| 114 | 5ay8 | 14-20 (C)                  | DNA1 | absent           | --                    | 15-20 (G) | DNA2       | absent    | --   |
| 115 | 5b0y | 15-20 (G)                  | DNA1 | 19-23 (F)        | AcIsl2                | 14-20 (C) | DNA2       | absent    | --   |
| 116 | 5b0z | 15-20 (G)                  | DNA1 | 20-23 (F)        | AcIsl2                | 11-20 (C) | DNA2+ DNA1 | absent    | --   |
| 117 | 5b1l | 15-20 (G)                  | DNA1 | 19-23 (F)        | AcIsl2+DNA1           | 11-20 (C) | DNA2       | absent    | --   |
| 118 | 5b1m | 15-20 (G)                  | DNA1 | 19-23 (F)        | AcIsl2                | 11-20 (C) | DNA2+ DNA1 | absent    | --   |

|     |      |                             |      |                  |             |           |            |           |           |
|-----|------|-----------------------------|------|------------------|-------------|-----------|------------|-----------|-----------|
| 119 | 5b24 | 15-20 (G)                   | DNA1 | 19-23 (F)        | AcIsl2+DNA1 | 11-20 (C) | DNA2       | absent    | --        |
| 120 | 5b2i | 14-20 (G)                   | DNA1 | 18-23 (F)        | AcIsl2+DNA1 | 13-20 (C) | DNA2+ DNA1 | 21-23 (B) | Other NCP |
| 121 | 5b2j | 14-20 (G)                   | DNA1 | 18-23 (F)        | AcIsl2+DNA1 | 13-20 (C) | DNA2       | 21-23 (B) | DNA2      |
| 122 | 5b31 | 16-20 (G)                   | DNA1 | 19-23 (F)        | AcIsl2      | 13-20 (C) | DNA2       | absent    | --        |
| 123 | 5b32 | 16-20 (G)                   | DNA1 | 19-23 (F)        | AcIsl2+DNA1 | 11-22 (C) | DNA2       | absent    | --        |
| 124 | 5b33 | 17-20 (G)                   | DNA1 | 19-23 (F)        | AcIsl2+DNA1 | 16-22 (C) | DNA2       | absent    | --        |
| 125 | 5b40 | 15-20 (G)                   | DNA1 | 22-23 (F)        | No contact  | 14-20 (C) | DNA2       | absent    | --        |
| 126 | 5cp6 | 15-20 (G)                   | DNA1 | <b>16-23 (F)</b> | AcIsl2+DNA1 | 14-20 (C) | DNA2       | 21-23 (B) | DNA2      |
| 127 | 5CPI | 15-20 (G)                   | DNA1 | 19-23 (F)        | AcIsl2+DNA1 | 11-20 (C) | DNA2       | absent    | --        |
| 128 | 5CPJ | 15-20 (G)                   | DNA1 | 19-23 (F)        | AcIsl2+DNA1 | 15-20 (C) | DNA2       | absent    | --        |
| 129 | 5CPK | 15-20 (G)                   | DNA1 | 19-23 (F)        | AcIsl2+DNA1 | 14-20 (C) | DNA2       | absent    | --        |
| 130 | 5dnm | 14-20 (G)                   | DNA1 | <b>16-23 (F)</b> | AcIsl2+DNA1 | 14-20 (C) | DNA2+ DNA1 | 21-23 (B) | Other NCP |
| 131 | 5dnn | 14-20 (G)                   | DNA1 | <b>16-23 (F)</b> | AcIsl2+DNA1 | 14-20 (C) | DNA2       | 21-23 (B) | DNA2      |
| 132 | 5e5a | 14-20 (G)                   | DNA1 | 17-23 (F)        | AcIsl2+DNA1 | 14-20 (C) | DNA2       | absent    | --        |
| 133 | 5f99 | 9-20 (G)                    | DNA1 | <b>11-23 (F)</b> | AcIsl2+DNA1 | 11-20 (C) | DNA2       | 20-23 (B) | Other NCP |
| 134 | 5gse | Unusual structure           |      |                  |             |           |            |           |           |
| 135 | 5gsu | 16-20 (G)                   | DNA1 | 17-23 (F)        | AcIsl2      | 15-20 (C) | DNA2       | absent    | --        |
| 136 | 5gt0 | 14-20 (C)                   | DNA1 | absent           | --          | 13-20 (G) | DNA2       | 17-23 (F) | AcIsl1    |
| 137 | 5gt3 | 16-20 (G)                   | DNA1 | 18-23 (F)        | AcIsl2      | 13-20 (C) | DNA2       | 21-23 (B) | --        |
| 138 | 5gtc | 12-20 (G)                   | DNA1 | 17-23 (F)        | AcIsl2+DNA1 | 11-20 (C) | DNA2       | absent    | --        |
| 139 | 5gxq | 15-20 (G)                   | DNA1 | 19-23 (F)        | AcIsl2+DNA1 | 11-20 (C) | DNA2       | absent    | --        |
| 140 | 5hq2 | No stacking. Incomplete NCP |      |                  |             |           |            |           |           |
| 141 | 5jrg | 10-20 (G)                   | DNA1 | 17-23 (F)        | AcIsl2+DNA1 | 12-20 (C) | DNA2       | absent    | --        |
| 142 | 5kgf | Cryo-EM. Single molecule    |      |                  |             |           |            |           |           |
| 143 | 5mlu | 16-20 (C)                   | DNA1 | 19-23 (B)        | AcIsl2      | 14-20 (G) | DNA2       | absent    | --        |
| 144 | 5nl0 | 16-20 (G)                   | DNA1 | 20-23 (F)        | DNA2        | 14-20 (C) | DNA2       | 20-23 (B) | DNA1      |
| 145 | 5x0x | Cryo-EM. Single molecule    |      |                  |             |           |            |           |           |
| 146 | 5x0y | Cryo-EM. Single molecule    |      |                  |             |           |            |           |           |
| 147 | 5x7x | 14-20 (G)                   | DNA1 | 17-23 (F)        | AcIsl2+DNA1 | 11-20 (C) | DNA2       | absent    | --        |



## Supporting references

1. Lavery, R., Moakher, M., Maddocks, J.H., Petkeviciute, D. and Zakrzewska, K. (2009) Conformational analysis of nucleic acids revisited: Curves+. *Nucleic Acids Res.*, **37**, 5917-5929.
2. Blanchet, C., Pasi, M., Zakrzewska, K. and Lavery, R. (2011) CURVES+ web server for analyzing and visualizing the helical, backbone and groove parameters of nucleic acid structures. *Nucleic Acids Res.*, **39**, W68-W73.
3. Fan, Y., Korolev, N., Lyubartsev, A.P. and Nordenskiöld, L. (2013) An advanced coarse-grained nucleosome core particle model for computer simulations of nucleosome-nucleosome interactions under varying ionic conditions. *PLoS One*, **8**, e54228.
4. Lyubartsev, A.P., Korolev, N., Fan, Y. and Nordenskiöld, L. (2015) Multiscale modelling of nucleosome core particle aggregation. *J. Phys. Condens. Matter*, **27**, 064111.
5. Lyubartsev, A.P. and Nordenskiöld, L. (1997) Monte Carlo simulation study of DNA polyelectrolyte properties in the presence of multivalent polyamine ions. *J.Phys.Chem.B*, **101**, 4335-4342.
6. Korolev, N., Lyubartsev, A.P., Rupprecht, A. and Nordenskiöld, L. (1999) Experimental and Monte Carlo simulation studies on the competitive binding of  $\text{Li}^+$ ,  $\text{Na}^+$ , and  $\text{K}^+$  ions to DNA in oriented DNA fibers. *J.Phys.Chem.B*, **103**, 9008-9019.
7. Korolev, N., Lyubartsev, A.P., Rupprecht, A. and Nordenskiöld, L. (1999) Competitive binding of  $\text{Mg}^{2+}$ ,  $\text{Ca}^{2+}$ ,  $\text{Na}^+$ , and  $\text{K}^+$  to DNA in oriented DNA fibers: experimental and Monte Carlo simulation results. *Biophys.J.*, **77**, 2736-2749.
8. Korolev, N., Lyubartsev, A.P., Rupprecht, A. and Nordenskiöld, L. (2001) Competitive substitution of hexammine cobalt(III) for  $\text{Na}^+$  and  $\text{K}^+$  ions in oriented DNA fibers. *Biopolymers*, **58**, 268-278.
9. Montoro, J.C.G. and Abascal, J.L.F. (1995) Ionic distribution around simple DNA models. I. Cylindrically averaged properties. *J.Chem.Phys.*, **103**, 8273-8284.
10. Montoro, J.C.G. and Abascal, J.L.F. (1998) Ionic distribution around simple B-DNA models. II. Deviations from cylindrical symmetry. *J.Chem.Phys.*, **109**, 6200-6210.
11. Davey, C.A., Sargent, D.F., Luger, K., Maeder, A.W. and Richmond, T.J. (2002) Solvent mediated interactions in the structure of nucleosome core particle at 1.9 Å resolution. *J.Mol.Biol.*, **319**, 1097-1113.
12. Haliloglu, T., Bahar, I. and Erman, B. (1997) Gaussian dynamics of folded proteins. *Phys. Rev. Lett.*, **79**, 3090-3093.
13. Biswas, M., Voltz, K., Smith, J.C. and Langowski, J. (2011) Role of histone tails in structural stability of the nucleosome. *PLoS Comput. Biol.*, **7**, e1002279.
14. Voltz, K., Trylska, J., Tozzini, V., Kurkal-Siebert, V., Langowski, J. and Smith, J. (2008) Coarse-grained force field for the nucleosome from self-consistent multiscaling. *J.Comp.Chem.*, **29**, 1429-1439.
15. Korolev, N., Yu, H., Lyubartsev, A.P. and Nordenskiöld, L. (2014) Molecular Dynamics simulations demonstrate the regulation of DNA-DNA attraction by H4 histone tail acetylations and mutations. *Biopolymers*, **101**, 1051-1064.
16. Nordenskiöld, L., Lyubartsev, A.P. and Korolev, N. (2008) DNA-DNA interaction. In Dias, R. S. and Lindman, B. (eds.), *DNA Interactions with Polymers and Surfactants*. John Wiley & Sons, Inc., London, pp. 209-237.
17. Korolev, N. and Nordenskiöld, L. (2007) H4 histone tail mediated DNA-DNA interaction and effects on DNA structure, flexibility and counterion binding. A molecular dynamics study. *Biopolymers*, **86**, 409-423.

18. Limbach, H.J., Arnold, A., Mann, B.A. and Holm, C. (2006) ESPResSo - an extensible simulation package for research on soft matter systems. *Comp.Phys.Comm.*, **174**, 704-727.
19. Korolev, N., Allahverdi, A., Yang, Y., Fan, Y., Lyubartsev, A.P. and Nordenskiöld, L. (2010) Electrostatic origin of salt-induced nucleosome array compaction. *Biophys. J.*, **99** 1896-1905.
20. Yang, Y., Lyubartsev, A.P., Korolev, N. and Nordenskiöld, L. (2009) Computer modeling reveals that modifications of the histone tail charges define salt-dependent interaction of the nucleosome core particles. *Biophys.J.*, **96**, 2082-2094.
21. Deserno, M. and Holm, C. (1998) How to mesh up Ewald sums. I. A theoretical and numerical comparison of various particle mesh routines. *J.Chem.Phys.*, **109**, 7678-7693.
22. Cheatham, T.E., III and Kollman, P.A. (1997) Molecular dynamics simulations highlight the structural differences among DNA:DNA, RNA:RNA, and DNA:RNA structures. *J.Amer.Chem.Soc.*, **119**, 4805-4825.
23. Lyubartsev, A.P. and Laaksonen, A. (1998) Molecular dynamics simulations of DNA in solution with different counter-ions. *J.Biomol.Struct.Dyn.*, **16**, 579-592.
24. Korolev, N., Lyubartsev, A.P., Nordenskiöld, L. and Laaksonen, A. (2001) Spermine: an "invisible" component in the crystals of *B*-DNA. A grand canonical Monte Carlo and molecular dynamics simulation study. *J.Mol.Biol.*, **308**, 907-917.
25. Schalch, T., Duda, S., Sargent, D.F. and Richmond, T.J. (2005) X-ray structure of a tetranucleosome and its implications for the chromatin fibre. *Nature*, **436**, 138-141.
26. Song, F., Chen, P., Sun, D., Wang, M., Dong, L., Liang, D., Xu, K.-M., Zhu, P. and Li, C. (2014) Cryo-EM study of the chromatin fiber reveals a double helix twisted by tetranucleosomal units. *Science*, **344**, 376-380.
27. Baker, N.A., Sept, D., Joseph, S., Holst, M.J. and McCammon, J.A. (2001) Electrostatics of nanosystems: application to microtubules and the ribosome. *Proc. Natl. Acad. Sci. U.S.A.*, **98**, 10037-10041.
28. Pettersen, E.F., Goddard, T.D., Huang, C.C., Couch, G.S., Greenblatt, D.M., Meng, E.C. and Ferrin, T.E. (2004) UCSF Chimera - A visualization system for exploratory research and analysis. *J.Comp.Chem.*, **25**, 1605-1612.
29. Luger, K., Mader, A.W., Richmond, R.K., Sargent, D.F. and Richmond, T.J. (1997) Crystal structure of the nucleosome core particle at 2.8 Å resolution. *Nature*, **389**, 251-260.
30. Harp, J.M., Hanson, B.L., Timm, D.E. and Bunick, G.J. (2000) Asymmetries in the nucleosome core particle at 2.5 Å resolution. *Acta Cryst., sect.D*, **56**, 1513-1534.
31. Suto, R.K., Clarksson, M.J., Tremethick, D.J. and Luger, K. (2000) Crystal structure of a nucleosome core particle containing the variant histone H2A.Z. *Nature Struct.Biol.*, **7**, 1121-1124.
32. White, C.L., Suto, R.K. and Luger, K. (2001) Structure of the yeast nucleosome core particle reveals fundamental changes in internucleosome interactions. *EMBO J.*, **20**, 5207-5218.
33. Suto, R.K., Edayathumangalam, R.S., White, C.L., Melander, C., Gottesfeld, J.M., Dervan, P.B. and Luger, K. (2003) Crystal structures of nucleosome core particles in complex with minor groove DNA-binding ligands. *J.Mol.Biol.*, **326**, 371-380.
34. Muthurajan, U.M., Bao, Y., Forsberg, L.J., Edayathumangalam, R.S., Dyer, P.N., White, C.L. and Luger, K. (2004) Crystal structures of histone Sin mutant nucleosomes reveal altered protein-DNA interactions. *EMBO J.*, **23**, 260-271.

35. Edayathumangalam, R.S., Weyermann, P., Gottesfeld, J.M., Dervan, P.B. and Luger, K. (2004) Molecular recognition of the nucleosomeal "supergroove". *Proc.Natl.Acad.Sci.U.S.A.*, **101**, 6864-6869.
36. Chakravarthy, S., Gundimella, S.K., Caron, C., Perche, P.Y., Pehrson, J.R., Khochbin, S. and Luger, K. (2005) Structural characterization of the histone variant macroH2A. *Mol.Cell.Biol.*, **25**, 7616-7624.
37. Barbera, A.J., Chodaparambil, J.V., Kelley-Clarke, B., Joukov, V., Walter, J.C., Luger, K. and Kaye, K.M. (2006) The nucleosomal surface as a docking station for Kaposi's sarcoma herpesvirus LANA. *Science*, **311**, 856-861.
38. Tsunaka, Y., Kajimura, N., Tate, S. and Morikawa, K. (2005) Alteration of the nucleosomal DNA path in the crystal structure of a human nucleosome core particle. *Nucleic Acids Res.*, **33**, 3424-3434.
39. Bao, Y., White, C.L. and Luger, K. (2006) Nucleosome core particles containing a poly(dA·dT) sequence element exhibit a locally distorted DNA structure. *J.Mol.Biol.*, **361**, 617-624.
40. Ong, M.S., Richmond, T.J. and Davey, C.A. (2007) DNA stretching and extreme kinking in the nucleosome core. *J.Mol.Biol.*, **368**, 1067-1074.
41. Clapier, C.R., Chakravarthy, S., Petosa, C., Fernández-Tornero, C., Luger, K. and Müller, C.W. (2008) Structure of the Drosophila nucleosome core particle highlights evolutionary constraints on the H2A-H2B histone dimer. *Proteins*, **71**, 1-7.
42. Tachiwana, H., Kagawa, W., Osakabe, A., Kawaguchi, K., Shiga, T., Hayashi-Takanaka, Y., Kimura, H. and Kurumizaka, H. (2010) Structural basis of instability of the nucleosome containing a testis-specific histone variant, human H3T. *Proc.Natl.Acad.Sci.U.S.A.*, **107**, 10454-10459.
43. Tachiwana, H., Kagawa, W., Shiga, T., Osakabe, A., Miya, Y., Saito, K., Hayashi-Takanaka, Y., Oda, T., Sato, M., Park, S.Y. *et al.* (2011) Crystal structure of the human centromeric nucleosome containing CENP-A. *Nature*, **476**, 232-235.
44. Tachiwana, H., Osakabe, A., Shiga, T., Miya, Y., Kimura, H., Kagawa, W. and Kurumizaka, H. (2011) Structures of human nucleosomes containing major histone H3 variants. *Acta Cryst., sect.D*, **67**, 578-583.
45. Iwasaki, W., Tachiwana, H., Kawaguchi, K., Shibata, T., Kagawa, W. and Kurumizaka, H. (2011) Comprehensive structural analysis of mutant nucleosomes containing lysine to glutamine (KQ) substitutions in the H3 and H4 histone-fold domains. *Biochemistry*, **50**, 7822-7832.
46. Wu, B., Dröge, P. and Davey, C.A. (2008) Site selectivity of platinum anticancer therapeutics. *Nat.Chem.Biol.*, **4**, 110-112.
47. Lu, X., Simon, M.D., Chodaparambil, J.V., Hansen, J.C., Shokat, K.M. and Luger, K. (2008) The effect of H3K79 dimethylation and H4K20 trimethylation on nucleosome and chromatin structure. *Nat. Struct. Mol. Biol.*, **15**, 1122-1124.
48. Davey, G.E., Wu, B., Dong, Y., Surana, U. and Davey, C.A. (2010) DNA stretching in the nucleosome facilitates alkylation by an intercalating antitumour agent. *Nucleic Acids Res.*, **38**, 2081-2088.
49. Watanabe, S., Resch, M., Lilyestrom, W., Clark, N., Hansen, J.C., Peterson, C. and Luger, K. (2010) Structural characterization of H3K56Q nucleosomes and nucleosomal arrays. *Biochim.Biophys.Acta*, **1799**, 480-486.
50. Wu, B., Mohideen, K., Vasudevan, D. and Davey, C.A. (2010) Structural insight into the sequence dependence of nucleosome positioning. *Structure*, **18**, 528-536.
51. Wu, B. and Davey, C.A. (2010) Using soft X-rays for a detailed picture of divalent metal binding in the nucleosome. *J.Mol.Biol.*, **398**, 633-640.

52. Vasudevan, D., Chua, E.Y. and Davey, C.A. (2010) Crystal structures of nucleosome core particles containing the '601' strong positioning sequence. *J.Mol.Biol.*, **403**, 1-10.
53. Mohideen, K., Muhammad, R. and Davey, C.A. (2010) Perturbations in nucleosome structure from heavy metal association. *Nucleic Acids Res.*, **38**, 6301-6311.
54. Wu, B., Ong, M.S., Groessl, M., Adhireksan, Z., Hartinger, C.G., Dyson, P.J. and Davey, C.A. (2011) A ruthenium antimetastasis agent forms specific histone protein adducts in the nucleosome core. *Chemistry*, **17**, 3562-3566.
55. Makde, R.D., England, J.R., Yennawar, H.P. and Tan, S. (2010) Structure of RCC1 chromatin factor bound to the nucleosome core particle. *Nature*, **467**, 562-566.
56. Todd, R.C. and Lippard, S.J. (2010) Consequences of cisplatin binding on nucleosome structure and dynamics. *Chem. Biol.*, **17**, 1334-1343.
57. Wu, B., Davey, G.E., Nazarov, A.A., Dyson, P.J. and Davey, C.A. (2011) Specific DNA structural attributes modulate platinum anticancer drug site selection and cross-link generation. *Nucleic Acids Res.*, **39**, 8200-8212.
58. Armache, K.J., Garlick, J.D., Canzio, D., Narlikar, G.J. and Kingston, R.E. (2011) Structural basis of silencing: Sir3 BAH domain in complex with a nucleosome at 3.0 Å resolution. *Science*, **334**, 977-982.
59. Chua, E.Y., Vasudevan, D., Davey, G.E., Wu, B. and Davey, C.A. (2012) The mechanics behind DNA sequence-dependent properties of the nucleosome. *Nucleic Acids Res.*, **40**, 6338-6352.
60. Iwasaki, W., Miya, Y., Horikoshi, N., Osakabe, A., Taguchi, H., Tachiwana, H., Shibata, T., Kagawa, W. and Kurumizaka, H. (2013) Contribution of histone N-terminal tails to the structure and stability of nucleosomes. *FEBS Open Bio*, **3**, 363-369.
61. Horikoshi, N., Sato, K., Shimada, K., Arimura, Y., Osakabe, A., Tachiwana, H., Hayashi-Takanaka, Y., Iwasaki, W., Kagawa, W., Harata, M. *et al.* (2013) Structural polymorphism in the L1 loop regions of human H2A.Z.1 and H2A.Z.2. *Acta Crystallogr. D Biol. Crystallogr.*, **69(Pt 12)**, 2431-2439.
62. Urahama, T., Horikoshi, N., Osakabe, A., Tachiwana, H. and Kurumizaka, H. (2014) Structure of human nucleosome containing the testis-specific histone variant TSH2B *Acta Cryst. F*, **70**, 444-449.
63. Arimura, Y., Shirayama, K., Horikoshi, N., Fujita, R., Taguchi, H., Kagawa, W., Fukagawa, T., Almouzni, G. and Kurumizaka, H. (2014) Crystal structure and stable property of the cancer-associated heterotypic nucleosome containing CENP-A and H3.3. *Sci. Rep.*, **4**, 7115.
64. Padavattan, S., Shinagawa, T., Hasegawa, K., Kumasaka, T., Ishii, S. and Kumarevel, T. (2015) Structural and functional analyses of nucleosome complexes with mouse histone variants TH2a and TH2b, involved in reprogramming. *Biochem. Biophys. Res. Commun.*, **464**, 929-935.
65. Meier, S.M., Hanif, M., Adhireksan, Z., Pichler, V., Novak, M., Jirkovsky, E., Jakupec, M.A., Arion, V.B., Davey, C.A., K., K.B. *et al.* (2013) Novel metal(II) arene 2-pyridinecarbothioamides: a rationale to orally active organometallic anticancer agents. *Chem. Sci.*, **4**, 1837-1846.
66. Wang, F., Li, G., Altaf, M., Lu, C., Currie, M.A., Johnson, A. and Moazed, D. (2013) Heterochromatin protein Sir3 induces contacts between the amino terminus of histone H4 and nucleosomal DNA. *Proc Natl Acad Sci U S A*, **110**, 8495-8500.
67. Adhireksan, Z., Davey, G.E., Campomanes, P., Groessl, M., Clavel, C.M., Yu, H., Nazarov, A.A., Yeo, C.H., Ang, W.H., Dröge, P. *et al.* (2014) Ligand substitutions between ruthenium-cymene compounds can control protein versus DNA targeting and anticancer activity. *Nat. Commun.*, **5**, 3462.

68. Yang, D., Fang, Q., Wang, M., Ren, R., Wang, H., He, M., Sun, Y., Yang, N. and Xu, R.M. (2013) *N*-acetylated Sir3 stabilizes the conformation of a nucleosome-binding loop in the BAH domain. *Nat. Struct. Mol. Biol.*, **20**, 1116-1118.
69. Arnaudo, N., Fernández, I.S., McLaughlin, S.H., Peak-Chew, S.Y., Rhodes, D. and Martino, F. (2013) The N-terminal acetylation of Sir3 stabilizes its binding to the nucleosome core particle. *Nat. Struct. Mol. Biol.*, **20**, 1119-1121.
70. Zhou, B.R., Jiang, J., Feng, H., Ghirlando, R., Xiao, T.S. and Bai, Y. (2015) Structural mechanisms of nucleosome recognition by linker histones. *Mol. Cell*, **59**, 628-638.
71. McGinty, R.K., Henrici, R.C. and Tan, S. (2014) Crystal structure of the PRC1 ubiquitylation module bound to the nucleosome. *Nature*, **514**, 591-596.
72. Chua, E.Y., Davey, G.E., Chin, C.F., Dröge, P., Ang, W.H. and Davey, C.A. (2015) Stereochemical control of nucleosome targeting by platinum-intercalator antitumor agents. *Nucleic Acids Res.*, **43**, 5284-5296.
73. Kato, H., Jiang, J., Zhou, B.R., Rozendaal, M., Feng, H., Ghirlando, R., Xiao, T.S., Straight, A.F. and Bai, Y. (2013) A conserved mechanism for centromeric nucleosome recognition by centromere protein CENP-C. *Science*, **340**, 1110-1113.
74. Hanif, M., Meier, S.M., Adhireksan, Z., Henke, H., Martic, S., Labib, M., Kandioller, W., Jakupec, M.A., Kraatz, H.B., Davey, C.A. *et al.* Contrasting cytotoxicity and reactivity of RuII-arene complexes of morpholine vs thiomorpholine substituted 3-hydroxy-2-pyridone ligands. *To Be Published*
75. Chatterjee, N., North, J.A., Dechassa, M.L., Manohar, M., Prasad, R., Luger, K., Ottesen, J.J., Poirier, M.G. and Bartholomew, B. (2015) Histone acetylation near the nucleosome dyad axis enhances nucleosome disassembly by RSC and SWI/SNF. *Mol. Cell. Biol.*, **35**, 4083-4092.
76. Osakabe, A., Tachiwana, H., Kagawa, W., Horikoshi, N., Matsumoto, S., Hasegawa, M., Matsumoto, N., Toga, T., Yamamoto, J., Hanaoka, F. *et al.* (2015) Structural basis of pyrimidine-pyrimidone (6-4) photoproduct recognition by UV-DDB in the nucleosome. *Sci. Rep.*, **5**, 16330.
77. Urahama, T., Harada, A., Maehara, K., Horikoshi, N., Sato, K., Sato, Y., Shiraishi, K., Sugino, N., Osakabe, A., Tachiwana, H. *et al.* (2016) Histone H3.5 forms an unstable nucleosome and accumulates around transcription start sites in human testis. *Epigenetics Chromatin*, **9**, 2.
78. Morgan, M.T., Haj-Yahya, M., Ringel, A.E., Bandi, P., Brik, A. and Wolberger, C. (2016) Structural basis for histone H2B deubiquitination by the SAGA DUB module. *Science*, **351**, 725-728.
79. Wakamori, M., Fujii, Y., Suka, N., Shirouzu, M., Sakamoto, K., Umehara, T. and Yokoyama, S. (2015) Intra- and inter-nucleosomal interactions of the histone H4 tail revealed with a human nucleosome core particle with genetically-incorporated H4 tetra-acetylation. *Sci. Rep.*, **5**, 17204.
80. Kujirai, T., Horikoshi, N., Sato, K., Maehara, K., Machida, S., Osakabe, A., Kimura, H., Ohkawa, Y. and Kurumizaka, H. (2016) Structure and function of human histone H3.Y nucleosome. *Nucleic Acids Res.*, **44**, 6127-6141.
81. Suzuki, Y., Horikoshi, N., Kato, D. and Kurumizaka, H. (2016) Crystal structure of the nucleosome containing histone H3 with crotonylated lysine 122. *Biochem. Biophys. Res. Commun.*, **469**, 483-489.
82. Ueda, J., Harada, A., Urahama, T., Machida, S., Maehara, K., Hada, M., Makino, Y., Nogami, J., Horikoshi, N., Osakabe, A. *et al.* (2017) Testis-specific histone variant H3t gene is essential for entry into spermatogenesis. *Cell Rep.*, **18**, 593-600.
83. Horikoshi, N., Tachiwana, H., Kagawa, W., Osakabe, A., Matsumoto, S., Iwai, S., Sugawara, K. and Kurumizaka, H. (2016) Crystal structure of the nucleosome

- containing ultraviolet light-induced cyclobutane pyrimidine dimer. *Biochem. Biophys. Res. Commun.*, **471**, 117-122.
84. Fujii, Y., Wakamori, M., Umehara, T. and Yokoyama, S. (2016) Crystal structure of human nucleosome core particle containing enzymatically introduced CpG methylation. *FEBS Open Bio.*, **6**, 498-514.
  85. Horikoshi, N., Arimura, Y., Taguchi, H. and Kurumizaka, H. (2016) Crystal structures of heterotypic nucleosomes containing histones H2A.Z and H2A. *Open Biol.*, **6**, 160127.
  86. Machida, S., Sekine, S., Nishiyama, Y., Horikoshi, N. and Kurumizaka, H. (2016) Structural and biochemical analyses of monoubiquitinated human histones H2B and H4. *Open Biol.*, **6**, 160090.
  87. Ma, Z., Palermo, G., Adhireksan, Z., Murray, B.S., von Erlach, T., Dyson, P.J., Rothlisberger, U. and Davey, C.A. (2016) An organometallic compound which exhibits a DNA topology-dependent one-stranded intercalation mode. *Angew. Chem. Int. Ed. Engl.*, **55**, 7441-7444.
  88. Osakabe, A., Adachi, F., Arimura, Y., Maehara, K., Ohkawa, Y. and Kurumizaka, H. (2015) Influence of DNA methylation on positioning and DNA flexibility of nucleosomes with pericentric satellite DNA. *Open Biol.*, **5**, 150128.
  89. Adhireksan, Z., Palermo, G., Riedel, T., Ma, Z., Muhammad, R., Rothlisberger, U., Dyson, P.J. and Davey, C.A. (2017) Allosteric cross-talk in chromatin can mediate drug-drug synergy. *Nat. Commun.*, **8**, 14860.
  90. Fang, Q., Chen, P., Wang, M., Fang, J., Yang, N., Li, G. and Xu, R.M. (2016) Human cytomegalovirus IE1 protein alters the higher-order chromatin structure by targeting the acidic patch of the nucleosome. *Elife*, **5**, e11911.
  91. Frouws, T.D., Duda, S.C. and Richmond, T.J. (2016) X-ray structure of the MMTV-A nucleosome core. *Proc. Natl. Acad. Sci. U. S. A.*, **113**, 1214-1219.
  92. Kato, D., Osakabe, A., Arimura, Y., Mizukami, Y., Horikoshi, N., Saikusa, K., Akashi, S., Nishimura, Y., Park, S.Y., Nogami, J. *et al.* (2017) Crystal structure of the overlapping dinucleosome composed of hexasome and octasome. *Science*, **356**, 205-208.
  93. Padavattan, S., Thiruselvam, V., Shinagawa, T., Hasegawa, K., Kumasaka, T., Ishii, S. and Kumarevel, T. (2017) Structural analyses of the nucleosome complexes with human testis-specific histone variants, hTh2a and hTh2b. *Biophys. Chem.*, **221**, 41-48.
  94. Amamoto, Y., Aoi, Y., Nagashima, N., Suto, H., Yoshidome, D., Arimura, Y., Osakabe, A., Kato, D., Kurumizaka, H., Kawashima, S.A. *et al.* (2017) Synthetic posttranslational modifications: Chemical catalyst-driven regioselective histone acylation of native chromatin. *J. Am. Chem. Soc.*, **139**, 7568-7576.
  95. Taguchi, H., Xie, Y., Horikoshi, N., Maehara, K., Harada, A., Nogami, J., Sato, K., Arimura, Y., Osakabe, A., Kujirai, T. *et al.* (2017) Crystal structure and characterization of novel human histone H3 variants, H3.6, H3.7, and H3.8. *Biochemistry*, **56**, 2184-2196.
  96. Girish, T.S., McGinty, R.K. and Tan, S. (2016) Multivalent interactions by the Set8 histone methyltransferase with its nucleosome substrate. *J. Mol. Biol.*, **428**, 1531-1543.
  97. Osakabe, A., Arimura, Y., Matsumoto, S., Horikoshi, N., Sugawara, K. and Kurumizaka, H. (2017) Polymorphism of apyrimidinic DNA structures in the nucleosome. *Sci. Rep.*, **7**, 41783.
  98. Wilson, M.D., Benlekbir, S., Fradet-Turcotte, A., Sherker, A., Julien, J.P., McEwan, A., Noordermeer, S.M., Sicheri, F., Rubinstein, J.L. and Durocher, D. (2016) The structural basis of modified nucleosome recognition by 53BP1. *Nature*, **536**, 100-103.

99. Lesbats, P., Serrao, E., Maskell, D.P., Pye, V.E., O'Reilly, N., Lindemann, D., Engelman, A.N. and Cherepanov, P. (2017) Structural basis for spumavirus GAG tethering to chromatin. *Proc. Natl. Acad. Sci. U.S.A.*, **114**, 5509-5514.
100. Bednar, J., Garcia-Saez, I., Boopathi, R., Cutter, A.R., Papai, G., Reymer, A., Syed, S.H., Lone, I.N., Tonchev, O., Crucifix, C. *et al.* (2017) Structure and dynamics of a 197 bp nucleosome in complex with linker histone H1. *Mol. Cell*, **66**, 384-397.e388.
101. Liu, X., Li, M., Xia, X., Li, X. and Chen, Z. (2017) Mechanism of chromatin remodelling revealed by the Snf2-nucleosome structure. *Nature*, **544**, 440-445.
